1 **CDC5L surveils cellular stress responses and stress granule formation through**  
2 **transcriptional repression**

3  
4 Beituo Qian<sup>1,2,\*</sup>, Shunyi Li<sup>1,2,\*</sup>, Yongjia Duan<sup>1,\*</sup>, Feng Qiu<sup>1,2</sup>, Rirong Hu<sup>1,2</sup>, Wenkai Yue<sup>1,2</sup>, Jihong  
5 Cui<sup>1</sup>, Qiangqiang Wang<sup>1</sup>, Wanjin Li<sup>1,2</sup>, and Yanshan Fang<sup>1,2</sup>

6 <sup>1</sup>Interdisciplinary Research Center on Biology and Chemistry, Shanghai Institute of Organic  
7 Chemistry, Chinese Academy of Sciences, Shanghai 201210, China

8 <sup>2</sup>University of Chinese Academy of Sciences, Beijing 100049, China

9 \*These authors contributed equally to this work.

10 **Correspondence to:**

11 **Yanshan Fang:** [fangys@sioc.ac.cn](mailto:fangys@sioc.ac.cn)

12 **Tel:** +86-21-6858.2510

13 **ORCID:** <https://orcid.org/0000-0002-4123-0174>

14

15 **Short title:** CDC5L surveils stress responses

16 **Classification:** Biological sciences - Cell biology

17 **Keywords:** cellular stress, PERK, CDC5L, transcriptional repressor, stress granules

18

19 **Word counts:** ~8,700 words (excluding the title page and references)

20 **Figures and tables:** 6 main figures, 8 supplemental figures and 5 supplemental tables

21 **ABSTRACT** (≤ 250 words)

22 Cells have evolved a variety of mechanisms to respond to stress, such as activating the PERK–  
23 eIF2α pathway and forming stress granules (SGs). It is important that these mechanisms are  
24 inducted only when necessary and exerted at appropriate levels, to prevent spontaneous or  
25 excessive activation of stress responses. However, the mechanisms by which cells keep the  
26 stress response programs in check are elusive. In this study, we discovered that downregulation  
27 of *Cell Division Cycle 5 Like* (*CDC5L*) causes spontaneous SG formation in the absence of any  
28 stress, which is independent of its known functions in the cell cycle or the PRP19 complex. Instead,  
29 we found that *CDC5L* binds to the *PERK* promoter through its DNA-binding domains and  
30 represses *PERK* mRNA transcription. As a result, it negatively regulates the abundance of PERK  
31 protein and the phosphorylation levels of eIF2α, thereby suppressing the PERK–eIF2α signaling  
32 pathway and preventing undesirable SG assembly. Further RNA-sequencing (seq) and chromatin  
33 immunoprecipitation (ChIP)-seq analyses reveal a dual function of *CDC5L* in gene transcription:  
34 it acts as a transcriptional activator in cell cycle control but as a repressor in cellular stress  
35 responses. Finally, we show that the loss of *CDC5L* decreases cell viability and fly survival under  
36 mild stress conditions. Together, our findings demonstrate a previously unknown role and  
37 mechanism of *CDC5L* in the surveillance of cellular stress through transcriptional repression,  
38 which serves as a gatekeeper for the stress response programs such as the PERK–eIF2α  
39 pathway and SG formation.

40 **Significance statement** ( $\leq$  120 words)

41 Cells need to respond to stress promptly for survival. Meanwhile, it is equally important to prevent  
42 spontaneous or excessive activation of stress response programs when no stress or only minor  
43 stress is present. Here, we reveal that the DNA/RNA-binding protein CDC5L represses the  
44 transcription of a cluster of stress response genes including *PERK*. In doing so, CDC5L  
45 suppresses the PERK-eIF2 $\alpha$  pathway and prevents spontaneous SG assembly. Downregulation  
46 of *CDC5L* releases the restraint on these genes, resulting in an exaggerated response to stress  
47 and decreased viability in both cell and fly models. Taken together, this study demonstrates the  
48 existence of a gatekeeper mechanism that surveils the stress response programs and highlights  
49 the crucial role of CDC5L-mediated transcriptional repression in this regulation.

## 50 INTRODUCTION

51 Diverse cellular stress can occur throughout an individual's lifetime. The ultimate fate of a stressed  
52 cell depends on the type and severity of the stress as well as the cell's ability to promptly and  
53 properly cope with it. For instance, oxidative stress, heat shock, and other stressors can lead to  
54 rapid assembly of SGs, which are then dismantled when the stress is relieved. The dynamic  
55 assembly and disassembly of SGs are believed to promote cell survival during stress and are  
56 implicated in various physiological and pathophysiological processes (Alberti and Hyman, 2021;  
57 Glauninger et al., 2022).

58 SGs are membraneless biomolecular condensates that contain RNA and phase-separated  
59 proteins, particularly RNA-binding proteins (RBPs) (Protter and Parker, 2016; Alberti and Hyman,  
60 2021; Roden and Gladfelter, 2021; Glauninger et al., 2022). For example, the Ras-GTPase-  
61 activating protein SH3 domain-binding protein (G3BP) serves as a central RBP of SGs, and  
62 depleting it abolishes SG formation (Guillen-Boixet et al., 2020; Yang et al., 2020; Gwon et al.,  
63 2021). Additionally, various nuclear RBPs such as T-cell intracellular antigen 1-related (TIAR),  
64 TAR DNA-binding protein 43 (TDP-43) and fused in sarcoma (FUS) are recruited from the nucleus  
65 to the cytoplasm, participating in SG assembly (Ravanidis et al., 2018; Youn et al., 2019; Portz et  
66 al., 2021). These SG-associated RBPs are often detected in pathological protein inclusions  
67 present in patients with amyotrophic lateral sclerosis (ALS) or frontotemporal dementia (FTD).  
68 Furthermore, disease-causing mutations have been identified in the genes encoding these  
69 proteins. As a result, the aberrant formation and transition of liquid droplet-like SGs to solid protein  
70 aggregation are believed to play a significant role in the pathogenesis of these diseases (Wolozin  
71 and Ivanov, 2019; Baradaran-Heravi et al., 2020; Alberti and Hyman, 2021). Hence, it is crucial to  
72 prevent undesired SG assembly in the first place.

73 A well-known signaling pathway that triggers SG formation is the protein kinase RNA-like  
74 endoplasmic reticulum kinase (PERK)–eukaryotic initiation factor 2 alpha (eIF2 $\alpha$ ) pathway. A



75 variety of cellular stressors, such as endoplasmic reticulum (ER) stress, heat-shock stress, and  
76 arsenite-induced oxidative stress, can activate PERK, a kinase that phosphorylates eIF2 $\alpha$ .  
77 Consequently, the phosphorylation levels of eIF2 $\alpha$  increase rapidly, leading to the inhibition of  
78 mRNA translation and the initiation of SG assembly. The translation initiation factors, 40S  
79 ribosomal subunits, untranslated mRNAs and some RBPs condense to form the core of SGs,  
80 which further incorporates additional RBPs to become mature SGs (Anderson and Kedersha,  
81 2009; Buchan and Parker, 2009). And, it is shown that modulation of eIF2 $\alpha$  phosphorylation levels,  
82 for example, by using PERK inhibitors, can regulate the assembly-disassembly dynamics of SGs  
83 (Zhang et al., 2018b; Fang et al., 2019; Hans et al., 2020).

84 Various chemicals, such as oxidative stress-inducing arsenite and proteasome inhibitor  
85 bortezomib, as well as harsh physical conditions like heat-shock stress, are commonly employed  
86 in laboratories to induce SGs. In addition, overexpression (OE) of G3BP1 is sufficient to trigger  
87 SG assembly (Guillen-Boixet et al., 2020; Yang et al., 2020). However, it is worth noting that SGs  
88 are seldom associated with loss-of-function (LOF) mutations in genes, which raises doubts  
89 regarding whether the formation of SGs is an intrinsic, genetically-programmed cellular function  
90 (Alberti et al., 2019; Glauninger et al., 2022; Putnam et al., 2023). Here, we report that  
91 downregulation of *CDC5L*, a highly conserved gene in eukaryotes, leads to spontaneous SG  
92 formation. *CDC5L* encodes a DNA/RNA-binding protein that was initially identified as an essential  
93 gene for G2/M progression in the cell cycle (Bernstein and Coughlin, 1998). Subsequently, it was  
94 found as a major component of the pre-mRNA-processing factor 19 (PRP19) complex, which is  
95 involved in various cellular processes such as splicing, transcription, and mRNA export (Ajuh et  
96 al., 2000; Boudrez et al., 2000; Chanarat and Strasser, 2013). Surprisingly, we find that the role  
97 of *CDC5L* in regulating SGs is independent of its known functions in the cell cycle or the PRP19  
98 complex. Instead, *CDC5L* functions as a transcriptional repressor, negatively regulating the  
99 PERK-eIF2 $\alpha$  pathway to suppress the undesired activation of stress responses and SG assembly.

## 100 RESULTS

### 101 Downregulation of *CDC5L* causes spontaneous SG formation and enhances SG assembly 102 in response to stress

103 A recent bioinformatic analysis of protein-protein interaction networks identified *CDC5L* as one of  
104 the major hub genes of ALS-related proteins, many of which are localized to SGs and/or  
105 associated with stress responses or cellular homeostasis (Kumar and Haider, 2022). However,  
106 the specific connection between *CDC5L* and SGs, as well as the underlying mechanism, remains  
107 unknown. In this study, our objective was to investigate the involvement of *CDC5L* in the regulation  
108 of SGs or cellular stress responses.

109 First, we knocked down *CDC5L* in HeLa cells using two independent small interfering RNAs  
110 (siRNAs) #1 and #2 (Figure S1A-B). Compared to the cells treated with the scrambled siRNA  
111 control (si-Ctrl), cells treated with the siRNAs against *CDC5L* exhibited increased incidence of  
112 spontaneous formation of G3BP1+ granules in the cytoplasm (Figure 1A-B). Since the two siRNAs  
113 targeting *CDC5L* showed similar knockdown (KD) efficiencies and induction effects on SG  
114 formation, we used the siRNA-#2 for the rest of the study and referred to it as si-*CDC5L*. We  
115 further confirmed that si-*CDC5L* induced the formation of SGs by immunostaining with another  
116 commonly used SG marker, TIAR (Figure S1C).

117 Next, we examined and showed that KD of *CDC5L* did not change the solubility of G3BP1  
118 protein (Figure 1C-D), which excluded the possibility that the si-*CDC5L*-induced cytoplasmic  
119 puncta were protein aggregates containing G3BP1. Further, we conducted the fluorescence  
120 recovery after photobleaching (FRAP) analysis in *live* cells using green fluorescent protein (GFP)-  
121 tagged G3BP1. The fluorescence intensity (FI) of the si-*CDC5L*-induced GFP-G3BP1 granules  
122 rapidly recovered after photobleaching (Figure 1E, 1H), and the kinetics was similar to that  
123 induced by acute arsenite stress (250  $\mu$ M, 0.5 h) (Figure 1F, 1H), suggesting that the GFP-G3BP1  
124 granules in both instances were dynamic and liquid-like. In contrast, under prolonged stress (250

125  $\mu\text{M}$ , 8 h), SGs were solidified, as evidenced by the markedly reduced FI recovery (Figure 1G-H).  
126 Together, these data indicate that loss of *CDC5L* causes spontaneous SG formation in cells.

127 Moreover, we found that the levels of *CDC5L* also modulated the assembly-disassembly  
128 dynamics of SGs in response to stress. Our data showed that for both arsenite stress (250  $\mu\text{M}$ ;  
129 Figure S2) and heat-shock stress (42°C; Figure S3), KD of *CDC5L* promoted SG assembly and  
130 hindered SG disassembly (Figure 1I-L), while OE of *CDC5L* delayed SG assembly and  
131 accelerated SG disassembly (Figure 1M-P).

132

### 133 **The impact of *CDC5L* on SGs is independent of the cell cycle or the PRP19 complex**

134 To understand how *CDC5L* regulates SG formation, we first examined how the CDC5L protein  
135 responded to stress. Unlike the SG marker TIAR, which was recruited from the nucleus to SGs in  
136 the cytoplasm upon arsenite stress, CDC5L was predominantly nuclear under normal conditions  
137 and remained in the nucleus during stress (Figure S4A). We then showed that the stress signaling  
138 pathway was indeed activated by arsenite stress, evidenced by increased phosphorylation levels  
139 of eIF2 $\alpha$  (Figure S4B-S4D). In contrast, the protein levels of CDC5L was unaffected (Figure S4B  
140 and S4E). Given that increase of G3BP1 levels could induce SG assembly (Guillen-Boixet et al.,  
141 2020; Yang et al., 2020), we examined the protein levels of G3BP1 in cells with si-*CDC5L* and no  
142 significant change was detected (Figure 1C-D), which excluded the possibility that KD of *CDC5L*  
143 promoted SG assembly by increasing G3BP1 levels.

144 CDC5L was known to play an important role in the cell cycle (Bernstein and Coughlin, 1998;  
145 Williams et al., 2006). Since KD of *CDC5L* might perturb the natural cell cycle and hinder G2/M  
146 progression, we wondered if spontaneous SG formation was associated with any specific phase  
147 in the cell cycle, particularly the G2/M phase. We then synchronized the phase of HeLa cells  
148 (Figure 2A; also see Methods and Figure S5) and scrutinized these cells for SGs by  
149 immunostaining with an anti-G3BP1 antibody. However, no spontaneous SG was found in the G1,  
150 S or G2/M phase (Figure 2B-C). Furthermore, we showed that KD of *CDC5L* could cause

151 spontaneous SG formation in all the above phases, and the incidence rate was similar in the  
152 different phases (Figure 2D-E). Of note, no SG was detected in cells that underwent active mitosis,  
153 which is consistent with the previous report that cells in the metaphase of mitosis did not form  
154 SGs even in the presence of arsenite stress (Sivan et al., 2007). Thus, an increase in the  
155 proportion of cells in the G2/M phase, for instance, by loss of *CDC5L* (Bernstein and Coughlin,  
156 1998), would decrease, but not increase, the likelihood of SG formation, which ruled out the  
157 possibility that the function of *CDC5L* in the cell cycle accounts for the si-*CDC5L*-induced  
158 spontaneous formation of SGs.

159 Another well-known function of *CDC5L* is its participation in the PRP19 complex, which  
160 regulates pre-mRNA splicing, transcription elongation, DNA repair, and other cellular processes  
161 (Boudrez et al., 2000; Chanarat and Strasser, 2013). We then knocked down each main  
162 component of the PRP19 complex, including PRP19, BCAS2 and PLRG1, in addition to *CDC5L*  
163 (Figure 2F). However, none of the remaining proteins manifested the same effect as KD of *CDC5L*  
164 to induce spontaneous SG formation (Figure 2G-H). Together, these results indicate that the role  
165 of *CDC5L* in regulating SGs is rather unique and not mediated by the PRP19 complex, suggesting  
166 an unexplored function and molecular mechanism of *CDC5L*.

167

### 168 **CDC5L regulates PERK protein abundance and the basal phosphorylation levels of eIF2 $\alpha$**

169 Next, we asked whether *CDC5L* affected the stress response pathways, such as the PERK–eIF2 $\alpha$   
170 signaling pathway, which is activated in response to arsenite or heat-shock stress and initiates  
171 SG assembly (Anderson and Kedersha, 2009; Buchan and Parker, 2009). Interestingly, we found  
172 that both the protein abundance of PERK and the phosphorylation levels of eIF2 $\alpha$  were  
173 significantly increased by *CDC5L* KD (Figure 3A-C), indicating an elevated basal level of the  
174 PERK–eIF2 $\alpha$  pathway. We confirmed that increase of PERK protein levels by transient OE of  
175 *PERK*-HA could increase the phosphorylation levels of eIF2 $\alpha$  (Figure 3D-E) and was sufficient to  
176 induce SG assembly (Figure 3F-G). Furthermore, we demonstrated that KD of *PERK* substantially

177 reduced the increase of eIF2 $\alpha$  phosphorylation caused by *CDC5L* KD (Figure 3H-J) and abolished  
178 the spontaneous SG formation with si-*CDC5L* (Figure 3K-L). Together, these results suggest that  
179 *CDC5L* modulates the basal levels of the PERK-eIF2 $\alpha$  pathway, and its abnormal upregulation  
180 underlies the spontaneous SG formation in cells with loss of *CDC5L*.

181

### 182 **CDC5L binds to the *PERK* promoter and represses *PERK* mRNA transcription**

183 To understand why PERK protein abundance was affected by *CDC5L* KD, we examined the  
184 mRNA levels of *PERK* using quantitative real-time PCR (qPCR). The results showed that *CDC5L*  
185 KD dramatically increased the mRNA levels of *PERK* (Figure 4A). In contrast, the mRNA levels  
186 of three other kinases known to phosphorylate eIF2 $\alpha$ —protein kinase double-stranded RNA-  
187 dependent (PKR), general control non-derepressible-2 (GCN2), and heme-regulated inhibitor  
188 (HRI) (Donnelly et al., 2013)—were not significantly changed by *CDC5L* KD (Figure S6). This  
189 data indicates that *CDC5L* specifically affected *PERK* among the four eIF2 $\alpha$  kinases. Consistently,  
190 *CDC5L* OE decreased the mRNA levels of *PERK*, although to a moderate extent (Figure 4B),  
191 which suggests that *PERK* expression was constantly and adequately repressed in cells under  
192 normal conditions.

193 To examine whether *CDC5L* regulated *PERK* mRNA transcription, we performed a dual  
194 luciferase assay (Sherf et al., 1996). In brief, we amplified the predicted *PERK* promoter, the DNA  
195 fragment from ~2 kb upstream to ~200 bp downstream of the transcription start site (TSS) of  
196 *PERK* (chr2: 88, 627,275 - 88,629,464) (Figure 4C) and fused it to the firefly luciferase reporter  
197 gene (*PERK-luc*), which was co-transfected into HeLa cells with a vector to express Renilla  
198 luciferase (*Rluc*) as an internal control. The data indicated that *CDC5L* KD drastically increased  
199 (Figure 4D) whereas *CDC5L* OE modestly suppressed (Figure 4E) *PERK-luc* expression,  
200 consistent with the changes in *PERK* mRNA levels by *CDC5L* KD or OE (Figure 4A-B).

201 The *CDC5L* protein contains two DNA-binding domains (DBDs) at the N-terminus, a  
202 spliceosome-associated domain (SAD) at the C-terminus, and several putative nuclear

203 localization sequences (NLS) in the middle (Bernstein and Coughlin, 1998; van Maldegem et al.,  
204 2015). To determine what domain(s) within the CDC5L protein was required for regulating *PERK*  
205 transcription, we generated various constructs to express truncated CDC5L proteins, including  
206 the  $\Delta$ DBDs (aa 107-802),  $\Delta$ SAD (aa 1-500), SAD (aa 500-802), and DBDs (aa 1-165) of CDC5L-  
207 HA (Figure 4F), and compared them to the full-length (FL) CDC5L-HA using the luciferase reporter  
208 assay. Since OE of *CDC5L* exhibited only mild effects (Figure 4B and 4E), we instead examined  
209 them in a rescue experiment in the *CDC5L* KD background. si-*CDC5L* caused a robust  
210 upregulation of *PERK-luc*, which was significantly reduced by OE of FL as well as  $\Delta$ SAD and  
211 DBDs, but not  $\Delta$ DBDs or SAD, of the CDC5L-HA protein (Figure 4G). The result that SAD domain  
212 was dispensable for CDC5L to regulate *PERK* transcription suggested that the spliceosome-  
213 associated function of CDC5L was not required in this regulation, which was consistent with our  
214 earlier observation that KD of the other main component of the PRP19 splicing complex did not  
215 phenocopy the effect of *CDC5L* KD on SG formation (Figure 2F-H).

216 The DBDs of CDC5L were sufficient and necessary for the repression of *PERK* transcription  
217 (Figure 4G), which prompted us to test whether the FL and truncated CDC5L-HA proteins could  
218 bind to the *PERK* promoter. We then performed the chromatin immunoprecipitation (ChIP) and  
219 semiquantitative PCR assay. Compared to the normal rabbit IgG control, ChIP for CDC5L-HA with  
220 an anti-HA antibody (rabbit) enriched the *PERK* promoter from cells expressing FL,  $\Delta$ SAD and  
221 DBDs, but not  $\Delta$ DBDs or SAD, of the CDC5L-HA protein (Figure 4H). We noted that despite the  
222 change in the sub-nuclear distributions, the DBDs-HA construct (which lacked the putative NLS)  
223 was still mostly expressed in the nucleus (Figure S7). Hence, we attached a nuclear export signal  
224 (NES) (Sun et al., 2021) to the C-terminus of the DBDs to generate a DBDs-NES-HA construct.  
225 As expected, the DBDs-NES-HA was localized to the cytoplasm (Figure S7E-S7F), which  
226 abolished the repressing effect of the DBDs-HA on *PERK* transcription (Figure 4G) as well as the  
227 binding to the *PERK* promoter (Figure 4H). Together, these data demonstrate that CDC5L binds  
228 to the *PERK* promoter through its DBDs and represses *PERK* mRNA transcription in the nucleus.

229

230 **CDC5L activates the transcription of cell cycle genes but represses that of stress response**  
231 **genes**

232 To further explore the function of CDC5L in regulating mRNA transcription, we carried out an RNA-  
233 sequencing (RNA-seq) analysis of the expression profile of HeLa cells treated with scrambled  
234 siRNA or si-*CDC5L*. We identified 1,226 differentially expressed genes (DEGs) that were  
235 downregulated and 871 DEGs that were upregulated in HeLa cells with *CDC5L* KD (fold change >  
236 2 or < 0.5 and *p*-value < 0.05 in three repeats) (Figure 5A and Table S1). Functional analysis of  
237 the downregulated DEGs showed that the gene ontology (GO) terms were enriched in the  
238 regulation of cell cycle processes (Figure 5B), consistent with the essential role of CDC5L in cell  
239 cycle control as previously reported (Bernstein and Coughlin, 1998; Mu et al., 2014). Intriguingly,  
240 none of the upregulated DEGs in *CDC5L* KD cells were enriched in the regulation of the cell cycle;  
241 instead, the top-ranked GO terms of the upregulated DEGs were linked to stress response and  
242 the associated functions, such as “Response to ER stress”, “ER-nucleus signaling pathway”, and  
243 “Cellular response to stress” (Figure 5C).

244 As the DEGs identified in the RNA-seq analysis included genes both directly and indirectly  
245 regulated by *CDC5L*, we performed the ChIP sequencing (ChIP-seq) analysis of CDC5L in HeLa  
246 cells to investigate the genome-wide transcriptional targets directly bound by CDC5L (Figure 5D).  
247 88,421 CDC5L-specific binding peaks were detected by MACS2 with a cutoff *q*-value < 0.05. The  
248 top 3,000 genes associated with the CDC5L-specific binding peaks were referred to as CDC5L-  
249 bound genes (CBGs) (Table S2). Functional analysis of the 3,000 CBGs identified “cellular  
250 responses to stress” as the most enriched biological process using Reactome (see Methods),  
251 along with “HSF1-dependent transactivation” and “cellular response to chemical stress” among  
252 the top twelve enriched pathways (Figure 5E).

253 We then cross-analyzed the data from the RNA-seq and ChIP-seq for overlapping genes to  
254 identify the direct targets of CDC5L. 179 CBGs in the ChIP-seq were found downregulated by



255 *CDC5L* KD in the RNA-seq, which were the target genes transcriptionally activated by *CDC5L*  
256 (Tables S3 and Figures 5F); whereas 99 CBGs in the ChIP-seq were upregulated by *CDC5L* KD  
257 in the RNA-seq, which were the target genes transcriptionally repressed by *CDC5L* (Tables S4  
258 and Figures 5G). The *CDC5L*-activated CBGs were enriched in cell cycle-related processes  
259 (Figure 5H), whereas *CDC5L*-repressed CBGs exhibited a strong association with pathways  
260 related to the regulation of stress response, including “Cellular response to external stimulus”,  
261 “Response to activity”, and “Cellular response to mechanical stimulus” (Figure 5I). And, the qPCR  
262 analysis confirmed the upregulation of other *CDC5L*-repressed stress response genes, such as  
263 *CALR*, *HEY1* and *BMP6*, in addition to *EIF2AK3* (*PERK*) in cells following *CDC5L* KD (Figure S8).  
264 Together, these results demonstrate that *CDC5L* acts as a transcription factor with dual function  
265 – it activates the transcription of cell cycle-related genes but represses the transcription of stress  
266 response genes.

267 Next, we analyzed the DNA motifs for *CDC5L* binding in the *CDC5L*-activated and *CDC5L*-  
268 repressed CBGs using MEME-ChIP (see Methods). Notably, two of the top three DNA motifs,  
269 “GGGAGGCY GAGGCRG” (Y for T or C, R for G or A) and “TGTTGSCCAGGCTGG” (S for G or  
270 C), were shared in the *CDC5L*-activated and *CDC5L*-repressed CBGs (Figure 5J-K), suggesting  
271 that the opposite effects of *CDC5L* in regulating the transcription of cell cycle genes and stress  
272 response genes were not attained by binding to different DNA motifs. Alternatively, it might be  
273 achieved by *CDC5L* recruiting different transcription coactivators/corepressors in a  
274 lineage/stimulus-specific manner, which is worth further investigation in the future.

275

### 276 **KD of *CDC5L/Cdc5* reduces the stress tolerance in cell and fly models**

277 As *CDC5L* acted as a transcriptional repressor of stress response genes, *CDC5L* KD led to  
278 upregulation of multiple stress signaling pathways, including the PERK-eIF2 $\alpha$  pathway (as shown  
279 earlier in this study). It raised the question whether changes in stress sensitivity and response  
280 levels resulting from manipulation of *CDC5L* expression levels would confer a survival advantage



281 or disadvantage. We then addressed this question using a propidium iodide (PI) staining assay,  
282 and the results showed that *CDC5L* KD enhanced whereas *CDC5L* OE ameliorated cell death in  
283 response to prolonged, mild stress (100  $\mu$ M arsenite, 10 h) (Figure 6A-D). Importantly, changes  
284 in *CDC5L* expression levels did not cause significant cell death in the absence of stress, indicating  
285 that the effect was specific to stress rather than related to the function of *CDC5L* in the cell cycle  
286 or other processes.

287 Finally, we extended our investigation to the *in vivo* model of *Drosophila*, the fruit fly. To avoid  
288 the influence on development, we used an inducible, ubiquitously expressed “*Tubulin (Tub)*-  
289 GeneSwitch (GS)” driver to downregulate *Cdc5* (the *Drosophila* homologue of *CDC5L*) in all fly  
290 cells from Day 1 of adulthood by adding RU486 to the fly food (Figure 6E). The flies, which were  
291 raised otherwise normally at 25°C, were subjected to a transient heat shock at 37°C for 1 h on  
292 Day 3 and then returned to 25°C for recovery (Figure 6F). To evaluate the viability of the flies,  
293 locomotor activity was measured using a climbing assay (see Methods). Before the heat shock (-  
294 3 h), the *TubGS>RNAi-Cdc5* flies exhibited normal climbing capability similar to that of the  
295 *TubGS>RNAi-Ctrl* flies (Figure 6G), which was consistent with the results that KD of *CDC5L* did  
296 not cause marked cell death without stress (Figure 6A-B). Right after the heat shock (0 h), both  
297 groups of the RNAi flies were unable to climb, confirming equal and sufficient heat-shock stress.  
298 At 3 h after the heat shock, the *TubGS>RNAi-Ctrl* flies started to recover, with approximately 30%  
299 of them able to climb, but the *TubGS>RNAi-Cdc5* flies failed to climb; by 6 h after the heat shock,  
300 approximately 90% of the *TubGS>RNAi-Ctrl* flies were able to climb, while only about 20% of the  
301 *TubGS>RNAi-Cdc5* flies could climb (Figure 6G). Together, the *TubGS>RNAi-Cdc5* flies  
302 appeared normal in the absence of stress; however, fewer of them recovered from heat shock  
303 and their recovery was significantly slower than that of the control flies, indicating that decrease  
304 in *Cdc5* expression levels made the flies less resistant to stress.

305 **DISCUSSION**

306 In this study, we investigate the role of *CDC5L* in cellular stress and SGs, and demonstrate that  
307 *CDC5L* negatively regulates the stress signaling pathway PERK–eIF2 $\alpha$  and prevents  
308 spontaneous and excessive activation of SG assembly. Formation of SGs is regarded as a  
309 common cellular mechanism to combat stress, and is conserved from yeast to flies and mammals  
310 (Protter and Parker, 2016; Zhang et al., 2018a; Grousl et al., 2022). Cellular toxins such as  
311 arsenite and physical conditions such as heat-shock stress are frequently used to induce SG  
312 assembly in laboratory research (including in part of this study), and there has been a coherent  
313 picture emerging for the signaling pathways and molecular mechanisms that sense these stressors  
314 and activate SG assembly (Protter and Parker, 2016; Hofmann et al., 2021; Glauninger et al.,  
315 2022). Meanwhile, cells have evolved a plethora of mechanisms to eliminate cellular wastes and  
316 stressors in order to maintain homeostasis, and defects or LOF of a gene critical for maintaining  
317 the cell homeostasis may cause accumulation of cellular stress and activation of the stress  
318 response pathways (Berchtold et al., 2018; Corbet et al., 2021; Qifti et al., 2021).

319 Here, we report another layer of cellular mechanism regulating the stress response programs.  
320 We observe the occurrence of spontaneous SG formation upon downregulation of *CDC5L*, which  
321 is independent of its known functions in the cell cycle or the PRP19 spliceosome complex.  
322 Previous global proteomic analyses have provided indications of potential interactions between  
323 *CDC5L* and TDP-43, along with other ALS-associated RBPs (Freibaum et al., 2010; Lières et al.,  
324 2010; Youn et al., 2018). Nevertheless, our results show that *CDC5L* is predominantly localized  
325 to the nucleus and its protein levels are unaltered during stress. Nor is *CDC5L* translocated to the  
326 cytoplasm or recruited to SGs like TDP-43, FUS or TIAR. Hence, unlike the previous speculation,  
327 the *CDC5L* protein is not directly involved in the assembly of SGs and the interactions between  
328 *CDC5L* and the ALS-associated, SG-composing RBPs likely take place in the nucleus. Although  
329 our study does not exclude the possibility that *CDC5L* may respond to stress at a post-translational

330 level, the ChIP-PCR and luciferase reporter assays indicate that CDC5L binds to the *PERK*  
331 promoter and represses *PERK* transcription, which suppresses the PERK–eIF2 $\alpha$  pathway and  
332 prevents spontaneous and excessive SG assembly.

333 Further investigation combining the RNA-seq and ChIP-seq analyses not only confirms the  
334 role of CDC5L as a transcription factor but also sheds light on its dual function in regulating two  
335 distinct gene clusters. One cluster of genes are predominantly linked to the regulation of the cell  
336 cycle and cell division. These genes display a significant downregulation in cells with *CDC5L* KD,  
337 emphasizing the crucial role of CDC5L in positively regulating the cell cycle (Bernstein and  
338 Coughlin, 1998; Mu et al., 2014). The other cluster comprises genes involved in cellular stress  
339 responses, such as *PERK*, which are upregulated in cells with *CDC5L* KD, indicating that CDC5L  
340 functions as a negative regulator of the stress response pathways. Adding to the intrigue, these  
341 distinct clusters of genes share the same top-ranked CDC5L-binding motifs within their promoters,  
342 suggesting that the differential transcriptional outcomes may be achieved through CDC5L's  
343 recruitment of different transcription cofactors. Notably, the DBDs of CDC5L alone were sufficient  
344 and its nuclear localization was required for the repression of *PERK* transcription, suggesting that  
345 the nuclear co-repressors recruited by CDC5L might interact with CDC5L via 107-165 aa. It is  
346 possible that CDC5L interacts with different transcription cofactors and additional proteins to  
347 regulate the expression of different sets of genes involved in the cell cycle control and cellular  
348 stress responses. By utilizing these diverse transcriptional interactions, CDC5L may fine-tune  
349 gene expression and facilitate specific cellular functions in response to varying physiological  
350 conditions.

351 The primary functions of SGs are to regulate mRNA metabolism, protein synthesis and  
352 cellular stress responses. By sequestering and storing untranslated mRNAs as well as potentially  
353 harmful proteins, such as those activating apoptosis and pyroptosis (Tsai and Wei, 2010; Samir  
354 et al., 2019), SGs serve as a protective mechanism to prevent the translation of non-essential  
355 mRNAs and suppress the initiation of cell death pathways during stress conditions (Anderson and

356 Kedersha, 2009; Buchan and Parker, 2009; Protter and Parker, 2016; Alberti and Hyman, 2021;  
357 Glauninger et al., 2022). Intriguingly, upregulating stress response genes and promoting SG  
358 assembly by KD of *CDC5L* do not promote cell survival under stressed conditions. Instead, in  
359 both mammalian cells and the fly model, KD of *CDC5L/Cdc5* significantly reduces the ability of  
360 cells and individuals to withstand mild but prolonged stress, including stress induced by arsenite  
361 and heat shock. Thus, prompt and appropriate responses to cellular stress are crucial, and  
362 augmentation of stress signaling pathways or elevation of stress response levels do not  
363 necessarily provide enhanced cell adaptation or resilience to “prepare for” stress.

364 CDC5L has been found to be highly expressed in certain cancers and is believed to promote  
365 tumorigenesis by increasing cancer cell proliferation (Chen et al., 2016; Li et al., 2017; Zhang et  
366 al., 2020), in accordance with its known function in the cell cycle and cell division. In this study,  
367 we identify CDC5L as a transcriptional repressor that negatively regulates the PERK-eIF2 $\alpha$   
368 pathway and is required to prevent spontaneous SG assembly. Our study not only provides the  
369 first actual link between CDC5L and cellular stress but also presents a new layer of regulation  
370 and a gatekeeping mechanism for how cells surveil stress responses. The potential implications  
371 of alterations in CDC5L expression levels and defects in the *CDC5L* gene in disease pathogenesis  
372 are captivating and warrant further investigation in future studies.

## 373 **MATERIALS AND METHODS**

### 374 **Plasmids and constructs**

375 To generate the pCAG-*CDC5L*-HA and pCAG-*PERK*-HA plasmids, the DNA fragments encoding  
376 human CDC5L and PERK were amplified from cDNA of HeLa cells by RT-PCR using the specific  
377 primers (Table S5), and then inserted into a pCAG vector (a kind gift from Dr. Y. Chen) between  
378 the XhoI and EcoRI sites using the ClonExpress MultiS One Step Cloning Kit (Vazyme, C113).  
379 For construction of the pCAG-*CDC5L*- $\Delta$ DBDs-HA, pCAG-*CDC5L*- $\Delta$ SAD-HA, pCAG-*CDC5L*-  
380 *SAD*-HA, pCAG-*CDC5L*-DBDs-HA and pCAG-*CDC5L*-DBDs-NES-HA plasmids, the truncated  
381 CDC5L fragments were amplified from the above pCAG-*CDC5L*-HA plasmid by PCR with the  
382 designated primers (Table S5) and sub-cloned into the pCAG vector, as described above.

383 To generate the pCAG-*GFP-G3BP1* plasmid, the DNA fragment encoding human G3BP1 was  
384 amplified from cDNA of HeLa cells by RT-PCR and then inserted into the pCAG-*GFP-TDP-43*  
385 plasmid (Wang et al., 2020) using the aforementioned method.

386 To generate the pcDNA3.1-*PERK-luc* plasmid, the promoter region (from -2 kb to 189 bp of  
387 the transcription start site) of *PERK* was amplified from the genomic DNA of HeLa cells by PCR  
388 and then sub-cloned into the pcDNA3.1-*Luciferase* (firefly) plasmid (a kind gift from Dr. K. He)  
389 between the MluI and NheI sites to replace original promoter using the ClonExpress MultiS One  
390 Step Cloning Kit (Vazyme, C113). All constructs were confirmed by sequencing before use. The  
391 sequences of all the primers used for plasmid construction are summarized in Supplemental Table  
392 S5.

393

### 394 **Cell culture and transfection**

395 HeLa cells (American Type Culture Collection, CCL-2) were cultured in the Dulbecco's modified  
396 Eagle's medium (DMEM) (Basalmedia, L110KJ) supplemented with 10% (vol/vol) fetal bovine  
397 serum (FBS) (Sigma-Aldrich, F8318) and 1% penicillin/streptomycin at 37°C in a humidified

398 atmosphere of 95% air and 5% CO<sub>2</sub>. Transient transfection of siRNA oligonucleotides  
399 (Genepharma, Shanghai) or plasmids was performed using Lipofectamine RNAiMAX (Thermo  
400 Fisher, 13778150) in Opti-MEM (Thermo Fisher, 51985034) or the PolyJet In Vitro DNA  
401 Transfection Reagent (SignaGen Laboratories, SL100688) in DMEM according to the  
402 manufacturers' instructions. Cells were transfected for at least 48 h before subsequent  
403 pharmacological treatment or examination.

404 The siRNA oligonucleotides used in this study are listed below:

405 si-Ctrl (scrambled siRNA): 5'-UUCUCCGAACGUGUCACGUTT-3'

406 si-*hCDC5L#1*: 5'-GCUGGAAGAACGUGAAAUATT-3'

407 si-*hCDC5L#2*: 5'-GCUCUCAAGUGAAGCUUAUTT-3'

408 si-*hPRP19*: 5'-GCCAAGUUCAUCGCUUCAATT-3'

409 si-*hPLRG1*: 5'-GCUGCAGAACCACAAAUUATT-3'

410 si-*hBCAS2*: 5'-GCUCGACAACCAAUUGAAUTT-3'

411 si-*hPERK*: 5'-GUGGAAAGGUGAGGUAUAUTT-3'

412 si-*hG3BP1*: 5'-CCUGAUGAUUCUGGAACUUTT-3'

413 si-*hG3BP2*: 5'-CAGUGAAUGUCAUACUAAATT-3'

414

#### 415 **Immunocytochemistry and confocal imaging**

416 HeLa cells grown on coverslips in a 24-well plate were transfected and/or treated as indicated,  
417 and then sequentially fixed with 4% paraformaldehyde (Sangon, A500684-0500) in the  
418 phosphate-buffered saline (PBS) (30 min), permeabilized in 0.5% Triton X-100 (Sigma-Aldrich,  
419 T8787) in the PBS (PBST; 30 min), and blocked with 3% goat serum in the PBST (blocking buffer;  
420 60 min) at room temperature (RT). Thereafter, cells were probed with the specific primary and  
421 secondary antibodies in the blocking buffer at 4°C overnight. After washing three times in the  
422 PBST, the cells were then mounted in the VECTASHIELD Antifade Mounting Medium with DAPI  
423 (Vector Laboratories, H-1200) on glass slides. Confocal images were taken with the Leica TCS

424 SP8 confocal microscopy system using a 63x oil objective (NA = 1.4) and analyzed with Leica  
425 Application Suite X (LAS X) software. The images were processed and assembled into figures  
426 using Adobe Photoshop 2021.

427

#### 428 **Cellular stress assays**

429 Arsenite stress: HeLa cells were transfected with the indicated siRNA or plasmids for at least 48  
430 h before treated with 250  $\mu$ M of NaAsO<sub>2</sub> or PBS for the indicated time periods up to 30 min,  
431 followed by fixation with 4% paraformaldehyde. For the recovery experiment, culture medium  
432 containing NaAsO<sub>2</sub> was removed and the cells were incubated in fresh medium for the indicated  
433 time prior to fixation.

434 Heat-shock stress: HeLa cells were transfected with the indicated siRNA or plasmids for at  
435 least 48 h before transferred to an incubator of 42°C for the indicated durations of time up to 30  
436 min, followed by fixation. For the recovery experiment, the cell plates were returned to the regular  
437 cell incubator of 37°C, and the cells were fixed and examined at the indicated time points.

438

#### 439 **Fluorescence recovery after photobleaching (FRAP) assay**

440 The FRAP assay was performed using the FRAP module of the Leica SP8 confocal microscopy  
441 system. In brief, each GFP-G3BP1 granule was bleached using a 488 nm laser at 100% laser  
442 power for approximately 4 s. After photobleaching, time-lapse images were captured every 1.2 s  
443 for the about 1 min. For each indicated time point (t), the fluorescence intensity within the bleached  
444 granule was normalized to the fluorescence intensity of a nearby, unbleached granule (to control  
445 for photobleaching during live imaging). The normalized fluorescence intensity of pre-bleaching  
446 was set to 100% and the normalized fluorescence intensity at each time point ( $I_t$ ) was used to  
447 calculate the fluorescence recovery (FR) according to the following formula:  $FR(t) = I_t/I_{pre-bleaching}$ .  
448 GraphPad Prism was used to plot and analyze the FRAP experiments.

449



450 **Protein extraction and western blotting**

451 Total proteins were extracted from cells using a 2% SDS extraction buffer (50mM Tris pH 7.4, 2%  
452 SDS, 3% DTT, 40% glycerol and 0.04% bromophenol blue) containing the protease inhibitor  
453 cocktail (Roche, 04693132001) and the phosphatase inhibitor cocktail (Roche, 04906837001).  
454 For separation of soluble and insoluble proteins, cells were lysed on ice in a RIPA buffer (50 mM  
455 Tris pH 8.0, 150 mM NaCl, 1% NP-40, 5 mM EDTA, 0.5% sodium deoxycholate, 0.1% SDS)  
456 supplemented with protease and phosphatase inhibitors. After sonication, the homogenates were  
457 centrifuged at 13,000 *g* for 20 min at 4°C. The supernatant was used as the soluble fraction and  
458 the pellets containing the insoluble fraction were dissolved in a urea buffer (9 M urea, 50 mM Tris  
459 buffer, pH 8.0) after washing.

460 All protein samples were then boiled at 100°C for 10 min, separated using 8% Tris-glycine  
461 sodium dodecyl-sulfate-polyacrylamide gel electrophoresis (SDS-PAGE), and probed with the  
462 primary and secondary antibodies listed below. The immunoblots were detected using the High-  
463 sig ECL Western Blotting Substrate (Tanon, 180-5001). Images were captured using an  
464 Amersham Imager 600 (GE Healthcare) and densitometry was measured using Image Quant TL  
465 Software (GE Healthcare). The contrast and brightness were optimized equally using Adobe  
466 Photoshop CS2021. GAPDH was used as a loading control for normalization, as indicated in the  
467 figures.

468

469 **Antibodies**

470 The following primary antibodies were used in this study: rabbit anti-PERK (CST, 3192S), rabbit  
471 anti-eIF2 $\alpha$  (CST, 5324S), rabbit anti-p-eIF2 $\alpha$  (CST, 9721S), rabbit anti-HA (CST, 3724T), rabbit  
472 anti-TIAR (CST, 8509S), mouse anti-CDC5L (BD Biosciences, 612362), mouse anti-G3BP1 (BD  
473 Biosciences, 611127), mouse anti-G3BP1 (Proteintech, 66486-1), mouse anti-GAPDH  
474 (Proteintech, 60004-1), normal rabbit IgG (CST, 2729S). HRP conjugated secondary antibodies:  
475 goat anti-mouse (Sigma-Aldrich, A4416) and goat anti-rabbit (Sigma-Aldrich, A9169). Fluorescent



476 secondary antibodies: goat anti mouse-Alexa Fluor 568 (Thermo Fisher, A11031) and goat anti  
477 rabbit-Alexa Fluor 488 (Thermo Fisher, A11034).

478

### 479 **Cell cycle synchronization**

480 Cell cycle synchronization was performed as previously described (Hong et al., 2004; Thuy et al.,  
481 2017). In brief, log-phase cells were first incubated with 1.7  $\mu$ M 20-hydroxyecdysone (Selleck,  
482 S2417) for 24 h to obtain cells in the G2 phase. Cells were then rinsed three times with the PBS,  
483 resuspended in fresh DMEM supplemented with 10% FBS along with 1.5 mM hydroxyurea  
484 (Selleck, S1896), and cultured for 18 h to reach the G1/S phase. Afterward, these cells were  
485 rinsed three times with the PBS, cultured in the above medium without hydroxyurea, and  
486 harvested at the indicated time points for the subsequent flow cytometry analysis or confocal  
487 imaging. For the flow cytometry analysis (Moflo Astrioseq EQ, Beckman), the cells were fixed in  
488 ethanol, incubated with RNase A and treated with propidium iodide (PI) (Sangon, E607306) for  
489 30 min.

490

### 491 **RNA extraction and quantitative real-time PCR (qPCR)**

492 For qPCR analysis, total RNA was isolated from HeLa cells or flies using RNAiso Plus (Takara,  
493 9109) according to the manufacturer's instruction. After DNase (Yeasen, 11141-B) treatment to  
494 eliminate genomic DNA, the reverse transcription (RT) reactions were performed using Hifair® III  
495 1st Strand cDNA Synthesis SuperMix for qPCR (Yeasen, 11141ES60). The resulting cDNA was  
496 then used for real-time qPCR with the Taq Pro Universal SYBR qPCR Master Mix (Vazyme, Q712-  
497 02) using the Quant Studio™ 6 Flex Real-Time PCR system (Thermo Fisher). The mRNA levels  
498 of *GAPDH* or *actin* were used as an internal control to normalize the mRNA levels of genes of  
499 interest. The qPCR primers used in this study are summarized in Table S5.

500

### 501 **Dual-luciferase reporter assay**

502 The *PERK-luc* (firefly) and pcDNA3.1-*rluc* (*Renilla*) plasmids were co-transfected into HeLa cells  
503 along with the indicated siRNA or plasmids in 96-well plates. After transfection for 48 h, the cells  
504 were examined using the Dual-Glo® Luciferase Assay System (Promega, E2920) according to  
505 the manufacturer's instruction. The luminescence signals of the firefly and *Renilla* luciferases  
506 were measured using the BioTek Synergy2 Multi-Detection Microplate Reader.

507

### 508 **Chromatin immunoprecipitation (ChIP) and ChIP-PCR**

509 HeLa cells (about  $6 \times 10^7$  cells/6 cm dish) transfected with the indicated plasmids were fixed in 1%  
510 (vol/vol) formaldehyde/PBS at 37°C for 10 min and quenched with 125 mM glycine at RT for 5  
511 min. After washing, the samples were lysed in a cytoskeleton buffer (10 mM PIPES (pH 6.8), 100  
512 mM NaCl, 3 mM MgCl<sub>2</sub>, 1 mM EGTA (pH 7.6), 0.3 M sucrose, 0.5% Triton X-100, 0.5 mM DTT  
513 and 5 mM sodium butyrate) at 4°C for 10 min, followed by centrifugation at 400 g at 4°C for 5 min.  
514 The pellets were resuspended in a micrococcal nuclease (MNase) buffer (50 mM Tris-HCl (pH  
515 7.5), 4 mM MgCl<sub>2</sub>, 1 mM CaCl<sub>2</sub>, 0.3 M sucrose, 0.5 mM DTT and 5 mM sodium butyrate) with  
516 2,000 units MNase (Beyotime, D7201S) at 37°C for 20 min, and the digestion was then stopped  
517 with 0.5 M EDTA at 4°C for 2 min.

518 The digested chromatin samples were centrifuged at 13,000 g at 4°C for 5 min and  
519 resuspended in 150 µL of a ChIP lysis buffer (1% SDS, 50 mM Tris-HCl, pH 8.0 and 10 mM EDTA)  
520 at 4°C for 10 min. 1,350 µL of the RIPA buffer was added to each lysed samples and sonicated  
521 for 3 cycles (10 s on/10 s off) using the Medical Ultrasonic Homogenizer Processor Cell Disruptor  
522 Mixer (Jingxin, JY92-IIN), resulting in DNA fragments of 100-600 bp. The supernatants were used  
523 for immunoprecipitation with Protein G Dynabeads (Thermo Fisher, 10004D) associated with the  
524 0.35 µg anti-HA rabbit mAb (CST, 3724T) or normal rabbit IgG (CST, 2729S) at 4°C for 5 h with  
525 gentle rotation.

526 Immunoprecipitated DNAs were dissolved in the ChIP Elution Buffer (0.1% SDS, 50 mM  
527 EDTA, 50 mM Tris-HCl, pH 8.0 and 50 mM NaHCO<sub>3</sub>) and reverse cross-linked at 65°C overnight.

528 The DNAs were then purified with the QIAGEN QIAquick PCR Purification Kit (QIAGEN, 28106)  
529 and amplified using the *PERK* or *GAPDH* promoter primers (Table S5). The resulting DNA  
530 products (195 bp for *PERK* and 166 bp for *GAPDH*) were examined by electrophoresis on 1.5%  
531 agarose gels.

532

### 533 **RNA-seq and data analysis**

534 Total RNAs from HeLa cells (about  $5 \times 10^7$  cells/10 cm dish) transfected with scrambled siRNA  
535 (si-Ctrl) or si-*CDC5L* were extracted using RNAiso Plus (Takara, 9109) according to the  
536 manufacturer's instruction. The quality and quantity of the RNA samples were examined using  
537 the 5400 Fragment Analyzer (Agilent, M5312AA). RNA libraries were constructed utilizing the  
538 NEBNext® Ultra RNA Library Prep Kit for Illumina (NEB, E7530L) and sequenced on an Illumina  
539 NovaSeq 6000 PE150 platform using the 150-bp pair-end sequencing parameters (Novogene,  
540 Beijing).

541 For the RNA-seq data, the output gene count tables from Salmon v0.9.1 (Patro et al., 2017)  
542 based on alignments to the human genome (hg38) annotation were used as input into the limma  
543 package v3.16.2 (Law et al., 2014). The differential expression genes (DEGs) were identified with  
544 the cutoff as follows:  $p$ -value  $< 0.05$  and fold change  $> 2$  or  $< 0.5$ . To analyze Gene Ontology (GO)  
545 and pathway enrichment for select subsets of genes, Metascape (<https://metascape.org/>) was  
546 used and  $p$ -value  $< 0.01$  was considered significant.

547

### 548 **ChIP-seq and data analysis**

549 The ChIP samples were prepared as described above. For sequencing, the quality and quantity  
550 of the immunoprecipitated DNAs were assessed using the Qubit® Fluorometer (Thermo Fisher,  
551 Q32866) and agarose gel electrophoresis. The ChIP libraries were constructed utilizing  
552 NEBNext® Ultra™ II DNA Library Prep Kit (NEB, E7645L) and sequenced on an Illumina  
553 NovaSeq 6000 PE150 platform using the 150-bp pair-end sequencing parameters (Novogene,

554 Beijing).

555 For the CHIP-seq data, paired-end reads were filtered for redundant reads and aligned using  
556 Bowtie2 (v2.2.5) to the human genome (hg38). Broad peaks were called with the MACS2 v2.2.7.1  
557 software using input as a negative control with a cutoff of  $q$ -value (minimum false discovery rate)  
558  $< 0.05$ . 88,421 peaks were called by MACS2, followed by blacklist filtering. The peaks identified  
559 by MACS2 were then assigned to the associated genes using BETA minus  
560 (<http://cistrome.org/BETA/index.html>) for downstream analyses. The top 3,000 assigned CDC5L-  
561 bound genes (CBGs) were uploaded to the online platform Metascape (<https://metascape.org/>)  
562 to identify the Reactome pathways with a cutoff of  $p$ -value  $< 0.01$ . The CDC5L-bound genomic  
563 regions were uploaded to MEME-ChIP v5.5.4 (Machanick and Bailey, 2011) for motif analysis with  
564 a cutoff of  $E$ -value (adjusted  $p$ -value)  $< 0.05$ .

565

#### 566 **Cell death assessment by PI staining**

567 HeLa cells were seeded at a density of  $1 \times 10^5$  cells/well in 24-well plates and transfected with the  
568 indicated siRNAs or plasmids for 48 h. To detect dead cells, the PI Staining Kit (Sangon, E607306)  
569 was used at 1:1,000 dilution and incubated at 37°C for 60 min according to the manufacturer's  
570 instruction.

571

#### 572 ***Drosophila* strains and husbandry**

573 The RNAi-*Cdc5* (TH03978.N) fly strain was obtained from the TsingHua Fly Center (THFC), the  
574 RNAi-*mCherry* (#35785, a control line for short hairpin RNAi KD) obtained from the Bloomington  
575 *Drosophila* Stock Center (BDSC), and the *TubGS* was a kind gift from N. Bonini. All flies were  
576 raised on standard cornmeal media and maintained at 25°C and 60% relative humidity. To induce  
577 the expression of the *TubGS* driver, adult flies were raised on regular fly food supplemented with  
578 160 µg/mL RU486 (mifepristone; TCI, 84371-65-3) dissolved in ethanol.

579

580 **Transient heat shock assay in flies**

581 About 15 flies in each regular fly vial with cornmeal food at the bottom were submerged into a  
582 water bath of 37°C for 1 h and then placed back to the fly incubator at 25°C for recovery. The  
583 locomotor activity, indicative of fly viability, was measured through a climbing assay at the  
584 indicated time points before or after the heat shock. In brief, flies were transferred into an empty  
585 polystyrene vial and gently tapped down to the bottom. The number of flies that climbed over a  
586 distance of 1 cm within 20 seconds was recorded. The test was repeated three times for each vial  
587 and 9-10 vials were examined per group.

588

589 **Statistical analysis**

590 Statistical significance in this study is determined by one-way ANOVA with Tukey's HSD post-hoc  
591 test, or unpaired, two-tailed Student's *t*-test at \* $p < 0.05$ , \*\* $p < 0.01$  and \*\*\* $p < 0.001$ . Error bars  
592 represent the standard error of the mean (SEM).

593 **ACKNOWLEDGEMENTS**

594 We thank the *Drosophila* stock centers BDSC and THFC providing the fly strains, Drs A. Li, Y.  
595 Chen, K. He and N. Bonini for sharing reagents, plasmids and fly lines, members of the Fang lab  
596 for helpful discussion, and A. Li and C. Tang for comments and critical reading of the manuscript.  
597 This study was supported by grants from the National Natural Science Foundation of China  
598 (32325016, 32270812, 22337005 and 31970697) and the Science and Technology Commission  
599 of Shanghai Municipality (20490712600 and 2019SHZDZX02) to Y. Fang.

600

601 **AUTHOR CONTRIBUTIONS**

602 Y.D. and Y.F. conceived the research; B.Q., S.L., Y.D., and Y.F. designed the experiments; B.Q.,  
603 S.L., Y.D., J.C. and Q.W. performed the experiments; R.H. and W.Y. contributed important new  
604 reagents; B.Q., S.L., F.Q., W.L. and Y.F. analyzed the data and interpret the results; B.Q. and S.L.  
605 prepared the figures; and B.Q., S.L., and Y.F. wrote the paper. All authors read and approved the  
606 final manuscript.

607

608 **AVAILABILITY OF DATA AND MATERIAL**

609 All essential data are presented in the main manuscript and the online Supporting Information.  
610 The RNA-seq and ChIP-seq datasets are deposited in the GEO Datasets (accession# 242280)  
611 and will be made publicly available when the paper is published. All unique and stable reagents  
612 generated in this study are available from the corresponding author with a complete Material  
613 Transfer Agreement.

614

615 **CONFLICT OF INTERESTS**

616 The authors declare no competing interests.

617

618 **REFERENCE**

- 619 Ajuh, P., Kuster, B., Panov, K., Zomerdijk, J.C., Mann, M., and Lamond, A.I. (2000). Functional  
620 analysis of the human CDC5L complex and identification of its components by mass  
621 spectrometry. *EMBO J* 19, 6569-6581.
- 622 Alberti, S., Gladfelter, A., and Mittag, T. (2019). Considerations and challenges in studying liquid-  
623 liquid phase separation and biomolecular condensates. *Cell* 176, 419-434.
- 624 Alberti, S., and Hyman, A.A. (2021). Biomolecular condensates at the nexus of cellular stress,  
625 protein aggregation disease and ageing. *Nat Rev Mol Cell Biol* 22, 196-213.
- 626 Anderson, P., and Kedersha, N. (2009). Stress granules. *Curr Biol* 19, R397-398.
- 627 Bernstein, H.S., and Coughlin, S.R. (1998). A mammalian homolog of fission yeast Cdc5 regulates  
628 G2 progression and mitotic entry. *J Biol Chem* 273, 4666-4671.
- 629 Baradaran-Heravi, Y., Van Broeckhoven, C., and van der Zee, J. (2020). Stress granule mediated  
630 protein aggregation and underlying gene defects in the FTD-ALS spectrum. *Neurobiology of*  
631 *Disease* 134, 104639.
- 632 Berchtold, D., Battich, N., and Pelkmans, L. (2018). A systems-level study reveals regulators of  
633 membrane-less organelles in human cells. *Mol Cell* 72, 1035-1049.e1035.
- 634 Boudrez, A., Beullens, M., Groenen, P., Van Eynde, A., Vulsteke, V., Jagiello, I., Murray, M.,  
635 Krainer, A.R., Stalmans, W., and Bollen, M. (2000). NIPP1-mediated interaction of protein  
636 phosphatase-1 with CDC5L, a regulator of pre-mRNA splicing and mitotic entry. *J Biol Chem*  
637 275, 25411-25417.
- 638 Buchan, J.R., and Parker, R. (2009). Eukaryotic stress granules: the ins and outs of translation.  
639 *Mol Cell* 36, 932-941.
- 640 Chanarat, S., and Strasser, K. (2013). Splicing and beyond: the many faces of the Prp19 complex.  
641 *Biochim Biophys Acta* 1833, 2126-2134.
- 642 Chen, W., Zhang, L., Wang, Y., Sun, J., Wang, D., Fan, S., Ban, N., Zhu, J., Ji, B., and Wang, Y.

- 643 (2016). Expression of CDC5L is associated with tumor progression in gliomas. *Tumour Biol*  
644 37, 4093-4103.
- 645 Corbet, G.A., Burke, J.M., and Parker, R. (2021). ADAR1 limits stress granule formation through  
646 both translation-dependent and translation-independent mechanisms. *J Cell Sci* 134,  
647 jcs258783.
- 648 Donnelly, N., Gorman, A.M., Gupta, S., and Samali, A. (2013). The eIF2alpha kinases: their  
649 structures and functions. *Cell Mol Life Sci* 70, 3493-3511.
- 650 Fang, M.Y., Markmiller, S., Vu, A.Q., Javaherian, A., Dowdle, W.E., Jolivet, P., Bushway, P.J.,  
651 Castello, N.A., Baral, A., Chan, M.Y., Linsley, J.W., Linsley, D., Mercola, M., Finkbeiner, S.,  
652 Lecuyer, E., Lewcock, J.W., and Yeo, G.W. (2019). Small-molecule modulation of TDP-43  
653 recruitment to stress granules prevents persistent TDP-43 accumulation in ALS/FTD. *Neuron*  
654 103, 802-819.e11.
- 655 Freibaum, B.D., Chitta, R.K., High, A.A., and Taylor, J.P. (2010). Global analysis of TDP-43  
656 interacting proteins reveals strong association with RNA splicing and translation machinery.  
657 *Journal of Proteome Research* 9, 1104-1120.
- 658 Glauninger, H., Wong Hickernell, C.J., Bard, J.A.M., and Drummond, D.A. (2022). Stressful steps:  
659 Progress and challenges in understanding stress-induced mRNA condensation and  
660 accumulation in stress granules. *Mol Cell* 82, 2544-2556.
- 661 Grousl, T., Vojtova, J., Hasek, J., and Vomastek, T. (2022). Yeast stress granules at a glance.  
662 *Yeast* 39, 247-261.
- 663 Guillen-Boixet, J., Kopach, A., Holehouse, A.S., Wittmann, S., Jahnel, M., Schlussler, R., Kim, K.,  
664 Trussina, I., Wang, J., Mateju, D., Poser, I., Maharana, S., Ruer-Gruss, M., Richter, D., Zhang,  
665 X., Chang, Y.T., Guck, J., Honigmann, A., Mahamid, J., Hyman, A.A., Pappu, R.V., Alberti, S.,  
666 and Franzmann, T.M. (2020). RNA-Induced conformational switching and clustering of G3BP  
667 drive stress granule assembly by condensation. *Cell* 181, 346-361.e17.
- 668 Gwon, Y., Maxwell, B.A., Kolaitis, R.-M., Zhang, P., Kim, H.J., and Taylor, J.P. (2021).



669 Ubiquitination of G3BP1 mediates stress granule disassembly in a context-specific manner.  
670 *Science* 372, eabf6548.

671 Hans, F., Glasebach, H., and Kahle, P.J. (2020). Multiple distinct pathways lead to  
672 hyperubiquitylated insoluble TDP-43 protein independent of its translocation into stress  
673 granules. *J Biol Chem* 295, 673-689.

674 Hofmann, S., Kedersha, N., Anderson, P., and Ivanov, P. (2021). Molecular mechanisms of stress  
675 granule assembly and disassembly. *Biochim Biophys Acta Mol Cell Res* 1868, 118876.

676 Hong, S.H., Hong, B., Kim, D.C., Rho, M.S., Park, J.I., Rha, S.H., Jun, H.S., and Jeong, J.S.  
677 (2004). Involvement of mitogen-activated protein kinases and p21Waf1 in hydroxyurea-  
678 induced G1 arrest and senescence of McA-RH7777 rat hepatoma cell line. *Exp Mol Med* 36,  
679 493-498.

680 Kumar, R., and Haider, S. (2022). Protein network analysis to prioritize key genes in amyotrophic  
681 lateral sclerosis. *IBRO Neurosci Rep* 12, 25-44.

682 Law, C.W., Chen, Y., Shi, W., and Smyth, G.K. (2014). voom: Precision weights unlock linear  
683 model analysis tools for RNA-seq read counts. *Genome Biol* 15, R29.

684 Li, J., Zhang, N., Zhang, R., Sun, L., Yu, W., Guo, W., Gao, Y., Li, M., Liu, W., Liang, P., Deng, W.,  
685 and Cui, X. (2017). CDC5L promotes hTERT expression and colorectal tumor growth. *Cell*  
686 *Physiol Biochem* 41, 2475-2488.

687 Llères, D., Denegri, M., Biggiogera, M., Ajuh, P., and Lamond, A.I. (2010). Direct interaction  
688 between hnRNP-M and CDC5L/PLRG1 proteins affects alternative splice site choice. *EMBO*  
689 *Rep* 11, 445-451.

690 Machanick, P., and Bailey, T.L. (2011). MEME-ChIP: motif analysis of large DNA datasets.  
691 *Bioinformatics* 27, 1696-1697.

692 Mu, R., Wang, Y.B., Wu, M., Yang, Y., Song, W., Li, T., Zhang, W.N., Tan, B., Li, A.L., Wang, N.,  
693 et al. (2014). Depletion of pre-mRNA splicing factor Cdc5L inhibits mitotic progression and  
694 triggers mitotic catastrophe. *Cell Death Dis* 5, e1151.

- 695 Patro, R., Duggal, G., Love, M.I., Irizarry, R.A., and Kingsford, C. (2017). Salmon provides fast  
696 and bias-aware quantification of transcript expression. *Nat Methods* 14, 417-419.
- 697 Portz, B., Lee, B.L., and Shorter, J. (2021). FUS and TDP-43 phases in health and disease.  
698 *Trends Biochem Sci* 46, 550-563.
- 699 Protter, D.S.W., and Parker, R. (2016). Principles and properties of stress granules. *Trends Cell*  
700 *Biol* 26, 668-679.
- 701 Putnam, A., Thomas, L., and Seydoux, G. (2023). RNA granules: functional compartments or  
702 incidental condensates? *Genes Dev* 37, 354-376.
- 703 Qifti, A., Jackson, L., Singla, A., Garwain, O., and Scarlata, S. (2021). Stimulation of  
704 phospholipase C $\beta$ 1 by Galphaq promotes the assembly of stress granule proteins. *Sci*  
705 *Signal* 14, eaav1012.
- 706 Ravanidis, S., Kattan, F.G., and Doxakis, E. (2018). Unraveling the pathways to neuronal  
707 homeostasis and disease: mechanistic insights into the role of RNA-binding proteins and  
708 associated factors. *Int J Mol Sci* 19, 2280.
- 709 Roden, C., and Gladfelter, A.S. (2021). RNA contributions to the form and function of biomolecular  
710 condensates. *Nat Rev Mol Cell Biol* 22, 183-195.
- 711 Samir, P., Kesavardhana, S., Patmore, D.M., Gingras, S., Malireddi, R.K.S., Karki, R., Guy, C.S.,  
712 Briard, B., Place, D.E., Bhattacharya, A., Sharma, B.R., Nourse, A., King, S.V., Pitre, A.,  
713 Burton, A.R., Pelletier, S., Gilbertson, R.J., and Kanneganti, T.D. (2019). DDX3X acts as a  
714 live-or-die checkpoint in stressed cells by regulating NLRP3 inflammasome. *Nature* 573, 590-  
715 594.
- 716 Sherf, B. A., Navarro, S. L., Hannah, R. R. & Wood, K. V. (1996). Dual-luciferase<sup>TM</sup> reporter assay:  
717 an advanced co-reporter technology integrating firefly and renilla luciferase assays. *Promega*  
718 *Notes* 57, 2–9.
- 719 Sivan, G., Kedersha, N., and Elroy-Stein, O. (2007). Ribosomal slowdown mediates translational  
720 arrest during cellular division. *Mol Cell Biol* 27, 6639-6646.

- 721 Sun, H., Huang, Y., Mei, S., Xu, F., Liu, X., Zhao, F., Yin, L., Zhang, D., Wei, L., Wu, C., et al.  
722 (2021). A nuclear export signal is required for cGAS to sense cytosolic DNA. *Cell Rep* 34,  
723 108586.
- 724 Thuy, T.T., Tam, N.T., Anh, N.T., Hau, D.V., Phong, D.T., Thang, L.Q., Adorasio, S., Van Sung, T.,  
725 and Delfino, D.V. (2017). 20-Hydroxyecdysone from *Dacrycarpus imbricatus* bark inhibits the  
726 proliferation of acute myeloid leukemia cells. *Asian Pac J Trop Med* 10, 157-159.
- 727 Tsai, N.-P., and Wei, L.-N. (2010). RhoA/ROCK1 signaling regulates stress granule formation and  
728 apoptosis. *Cellular Signalling* 22, 668-675.
- 729 van Maldegem, F., Maslen, S., Johnson, C.M., Chandra, A., Ganesh, K., Skehel, M., and Rada,  
730 C. (2015). CTNNB1 facilitates the association of CWC15 with CDC5L and is required to  
731 maintain the abundance of the Prp19 spliceosomal complex. *Nucleic Acids Res* 43, 7058-  
732 7069.
- 733 Wang, C., Duan, Y., Duan, G., Wang, Q., Zhang, K., Deng, X., Qian, B., Gu, J., Ma, Z., Zhang, S.,  
734 Guo, L., Liu, C., and Fang, Y. (2020). Stress induces dynamic, cytotoxicity-antagonizing TDP-  
735 43 nuclear bodies via paraspeckle lncRNA NEAT1-mediated liquid-liquid phase separation.  
736 *Mol Cell* 79, 443-458 e447.
- 737 Williams, S.D., Zhu, H., Zhang, L., and Bernstein, H.S. (2006). Adenoviral delivery of human  
738 CDC5 promotes G2/M progression and cell division in neonatal ventricular cardiomyocytes.  
739 *Gene Therapy* 13, 837-843.
- 740 Wolozin, B., and Ivanov, P. (2019). Stress granules and neurodegeneration. *Nat Rev Neurosci* 20,  
741 649-666.
- 742 Yang, P., Mathieu, C., Kolaitis, R.M., Zhang, P., Messing, J., Yurtsever, U., Yang, Z., Wu, J., Li, Y.,  
743 Pan, Q., Yu, J., Martin, E.W., Mittag, T., Kim, H.J., and Taylor, J.P. (2020). G3BP1 is a tunable  
744 switch that triggers phase separation to assemble stress granules. *Cell* 181, 325-345.e28.
- 745 Youn, J.Y., Dunham, W.H., Hong, S.J., Knight, J.D.R., Bashkurov, M., Chen, G.I., Bagci, H.,  
746 Rathod, B., MacLeod, G., Eng, S.W.M., Angers, S., Morris, Q., Fabian, M., Cote, J.F., and

- 747 Gingras, A.C. (2018). High-density proximity mapping reveals the subcellular organization of  
748 mRNA-associated granules and bodies. *Mol Cell* 69, 517-532 e511.
- 749 Youn, J.Y., Dyakov, B.J.A., Zhang, J., Knight, J.D.R., Vernon, R.M., Forman-Kay, J.D., and  
750 Gingras, A.C. (2019). Properties of stress granule and P-body proteomes. *Mol Cell* 76, 286-  
751 294.
- 752 Zhang, K., Coyne, A.N., and Lloyd, T.E. (2018a). *Drosophila* models of amyotrophic lateral  
753 sclerosis with defects in RNA metabolism. *Brain Research* 1693, 109-120.
- 754 Zhang, K., Daigle, J.G., Cunningham, K.M., Coyne, A.N., Ruan, K., Grima, J.C., Bowen, K.E.,  
755 Wadhwa, H., Yang, P., Rigo, F., et al. (2018b). Stress granule assembly disrupts  
756 nucleocytoplasmic transport. *Cell* 173, 958-971.e17.
- 757 Zhang, Y., Liu, T., Meyer, C.A., Eeckhoute, J., Johnson, D.S., Bernstein, B.E., Nusbaum, C.,  
758 Myers, R.M., Brown, M., Li, W., et al. (2008). Model-based analysis of ChIP-Seq (MACS).  
759 *Genome Biol* 9, R137.
- 760 Zhang, Z., Mao, W., Wang, L., Liu, M., Zhang, W., Wu, Y., Zhang, J., Mao, S., Geng, J., and Yao,  
761 X. (2020). Depletion of CDC5L inhibits bladder cancer tumorigenesis. *J Cancer* 11, 353-363.

762 **FIGURE LEGENDS**

763 **Figure 1. KD of *CDC5L* induces spontaneous SG formation and accelerates stress-induced**  
764 **SG assembly**

765 **(A-B)** Representative confocal images (A) and quantification (B) of HeLa cells transfected with  
766 scrambled siRNA as a control (si-Ctrl) or two independent siRNAs against *CDC5L* (si-*CDC5L*-#1  
767 and -#2). All cells are stained for G3BP1, *CDC5L* and DAPI (for nucleus). Arrows, G3BP1+  
768 granules. **(C-D)** Western blot analysis (C) and quantification (D) of the soluble (S, supernatants  
769 in RIPA) and insoluble (I, pellets resuspended in 9 M urea) fractions of the lysates of HeLa cells  
770 transfected with indicated siRNAs. All protein levels are normalized to GAPDH in the soluble  
771 fraction. **(E-H)** Representative images (E-G) and quantification (H) of the FRAP analysis of the  
772 fluorescence intensity (FI) of GFP-G3BP1 granules induced by KD of *CDC5L* (E), acute cellular  
773 stress (250  $\mu$ M arsenite, 0.5 h) (F), or prolonged cellular stress (250  $\mu$ M arsenite, 8 h) (G) in *live*  
774 cells. **(I-P)** The impact of KD (I-L) or OE (M-P) of *CDC5L* on the kinetics of SG assembly and  
775 disassembly is assessed by quantification of the average percentages of cells with SGs induced  
776 by arsenite stress (250  $\mu$ M) (I, K, M, O) or heat shock (42°C) (J, L, N, P) at the indicated time  
777 points after stress or during recovery (after arsenite washout or returning to 37°C; see Figure S2  
778 and S3 for the representative images). Data are shown in violin plots (B) or as mean  $\pm$  SEM (D,  
779 H-P).  $n \geq 200$  cells in each group from pooled results of 3 independent repeats (B, I-P),  $n = 3$  (D),  
780 and  $n \geq 18$  puncta in each group in (H). The statistical significance is determined by one-way  
781 ANOVA (B) or Student's *t*-test (D, I-P) with \* $p < 0.05$ , \*\* $p < 0.01$ , \*\*\* $p < 0.001$ ; ns, not significant.  
782 ud, undetected. Scale bars: 20  $\mu$ m in (A) and 2  $\mu$ m in (E-G).

783

784 **Figure 2. No spontaneous SG assembly during the cell cycle or by KD of other main**  
785 **components of the PRP19 complex**

786 **(A)** A diagram of the cell cycle assay. HeLa cells are synchronized to the G1 phase and then

787 released. The time and the corresponding phases of the cell cycle are indicated (see Methods  
788 and Figure S5). **(B-C)** No spontaneous SG assembly is observed in any phase of the cell cycle.  
789 **(D-E)** si-*CDC5L*-induced spontaneous SGs are found in all phases of the cell cycle at similar  
790 occurrence rates. G3BP1, SGs (arrows); DAPI, nucleus. **(F)** qPCR analysis confirming the KD  
791 efficiency of the siRNAs against the indicated main components of the PRP19 complex. All mRNA  
792 levels are normalized to *GAPDH* and shown as the average percentage to that of the control  
793 group (si-Ctrl, scrambled siRNA). **(G-H)** Representative confocal images (G) and quantification  
794 (H) of the average percentage of cells forming spontaneous SGs with the indicated siRNAs. Data  
795 are shown in violin plots (C, E, H) or as mean  $\pm$  SEM (F).  $n \geq 200$  cells in each group from pooled  
796 results of 3 independent repeats (C, E, H) and  $n = 3$  (F). One-way ANOVA; \*\*\* $p < 0.001$ ; ns, not  
797 significant. Scale bars: 10  $\mu\text{m}$ .

798

799 **Figure 3. The level of the PERK-eIF2 $\alpha$  pathway is markedly elevated and this increase**  
800 **underlies the *CDC5L* KD-induced SG formation**

801 **(A-E)** Representative images of the western blots (A, D) and quantifications of PERK protein  
802 levels (B) and eIF2 $\alpha$  phosphorylation levels (C, E) in HeLa cells with *CDC5L* KD (A-C) or *PERK*  
803 OE (D-E). p-eIF2 $\alpha$ , phosphorylated eIF2 $\alpha$ . **(F-G)** Representative confocal images (F) and  
804 quantification (G) of the percentage of cells forming SGs with *PERK* OE. G3BP1, SGs (arrows);  
805 DAPI, nucleus. **(H-J)** Western blot analysis (H) and quantifications of PERK protein levels (I) and  
806 eIF2 $\alpha$  phosphorylation levels (J) in HeLa cells with *CDC5L* KD in the absence or presence of  
807 *PERK* KD. **(K-L)** Representative confocal images (K) and quantification (L) of the percentage of  
808 cells forming SGs with *CDC5L* KD in the absence or presence of *PERK* KD. Mean  $\pm$  SEM (B-C,  
809 E, I-J) or violin plots (G, L).  $n = 3$  in (B-C, E, I-J) and  $n \geq 200$  cells in each group from pooled  
810 results of 3 independent repeats in (G, L). Student's *t*-test in (B-C, E, G) and one-way ANOVA in  
811 (I-J, L); \*\* $p < 0.01$ , \*\*\* $p < 0.001$ ; ns, not significant. Scale bars: 20  $\mu\text{m}$ .

812

813 **Figure 4. CDC5L represses *PERK* mRNA transcription through its DBDs**

814 **(A-B)** The qPCR analysis of the mRNA levels of *PERK* in HeLa cells with *CDC5L* KD (A) or OE  
815 (B). The mRNA levels are normalized to *GAPDH* and shown as fold change or percentage to that  
816 of the control group (set to 1 or 100%). **(C)** A schematic diagram showing the predicted promoter  
817 region of the human *PERK* gene. Red arrow, transcription start site (TSS). **(D-E)** Relative  
818 luciferase activity of *PERK-luc* in HeLa cells with *CDC5L* KD (D) or OE (E). Scrambled siRNA (si-  
819 Ctrl) and *lacZ*-HA are used as the KD and OE control in the luciferase reporter assay, respectively  
820 (the same below). **(F)** Diagrams showing the major functional domains of the full-length (FL)  
821 *CDC5L* protein and the different truncated *CDC5L*. DBDs, DNA-binding domains; SAD,  
822 spliceosome-associated domain; NLS, nuclear localization sequence; NES, nuclear export signal.  
823 **(G)** Relative luciferase activity of *PERK-luc* with *CDC5L* KD in HeLa cells, co-transfected with the  
824 FL or truncated *CDC5L* as indicated. **(H)** ChIP for *CDC5L*-HA followed by semiquantitative PCR  
825 for the promoter of *PERK* or *GAPDH* (negative control) are performed in HeLa cells  
826 overexpressing the FL or truncated *CDC5L*-HA. Mean  $\pm$  SEM; n = 3 in (A-B, D-E) and n = 6 in  
827 (G). Student's *t*-test in (A-B, D-E) and one-way ANOVA in (G); \*\* $p$  < 0.01, \*\*\* $p$  < 0.001; ns, not  
828 significant.

829

830 **Figure 5. CDC5L activates the transcription of cell cycle genes but represses that of stress**  
831 **response genes**

832 **(A)** Volcano plot showing the differentially expressed genes (DEGs) in the RNA-seq analysis of  
833 HeLa cells with *CDC5L* KD compared to the control cells (scrambled siRNA, si-Ctrl). Blue dots,  
834 downregulated DEGs; red dots, upregulated DEGs (fold change > 2 or < 0.5 and  $p$ -value < 0.05).  
835 **(B-C)** The top twelve enriched GO terms of biological processes associated with the  
836 downregulated (B) or upregulated (C) DEGs in (A). **(D)** The *CDC5L*-binding peaks throughout the  
837 genome of HeLa cells detected in the ChIP-seq analysis. **(E)** The top twelve enriched GO terms  
838 of the *CDC5L*-bound genes (CBGs) identified in the ChIP-seq. **(F-I)** Overlapping of the CBGs

839 from the ChIP-seq (green) and the downregulated (F, blue) or upregulated (G, red) DEGs from  
840 the RNA-seq identifies 179 CDC5L-activated (cyan) and 99 CDC5L-repressed (orange) CBGs,  
841 and the top twelve enriched GO terms of these genes are shown in (H) and (I), respectively. (J-  
842 K) The top three-ranked DNA motifs for CDC5L binding in the CDC5L-activated (J) or CDC5L-  
843 repressed (K) CBGs.

844

845 **Figure 6. KD of *CDC5L/Cdc5* makes mammalian cells and flies less tolerant to mild stress**  
846 (A-D) Representative confocal images (A, C) and quantifications (B, D) of propidium iodide (PI)  
847 staining of HeLa cells with *CDC5L* KD (A-B) or OE (C-D) in response to prolonged, mild stress  
848 (100  $\mu$ M arsenite, 10 h). Hoechst, nucleus; PI, cell death. (E) The qPCR analysis confirming the  
849 KD efficiency of RNAi-*Cdc5* in the *TubGS>RNAi-Cdc5* flies. RNAi-Ctrl: RNAi-*mCherry* flies. The  
850 mRNA levels are normalized to *actin* and shown as the percentage to that of the *TubGS>RNAi-*  
851 Ctrl flies. (F) A schematic diagram of the transient heat shock (HS) assay. 3-day old adult flies in  
852 tubes with food were gently submerged in a water bath of 37°C for 1 h and then put back to 25°C  
853 for recovery. The locomotor activity is assessed at 3 h before HS (pre-HS), right after HS (0 h),  
854 and at 3 or 6 h after HS (post-HS). (G) Quantification of the percentage of the *TubGS>RNAi-Cdc5*  
855 flies in each vial that climb over 1 cm within 20 seconds at the indicated time points. Mean  $\pm$  SEM;  
856  $n \geq 600$  cells in each group from pooled results of 3 independent repeats in (B and D),  $n = 3$  in  
857 (E), and  $n = 9-10$  vials/group with about 15 flies per vial in (G). Student's *t*-test; \*\* $p < 0.01$ , \*\*\* $p <$   
858 0.001; ns, not significant. Scale bars: 25  $\mu$ m.



Figure 1\_BQian

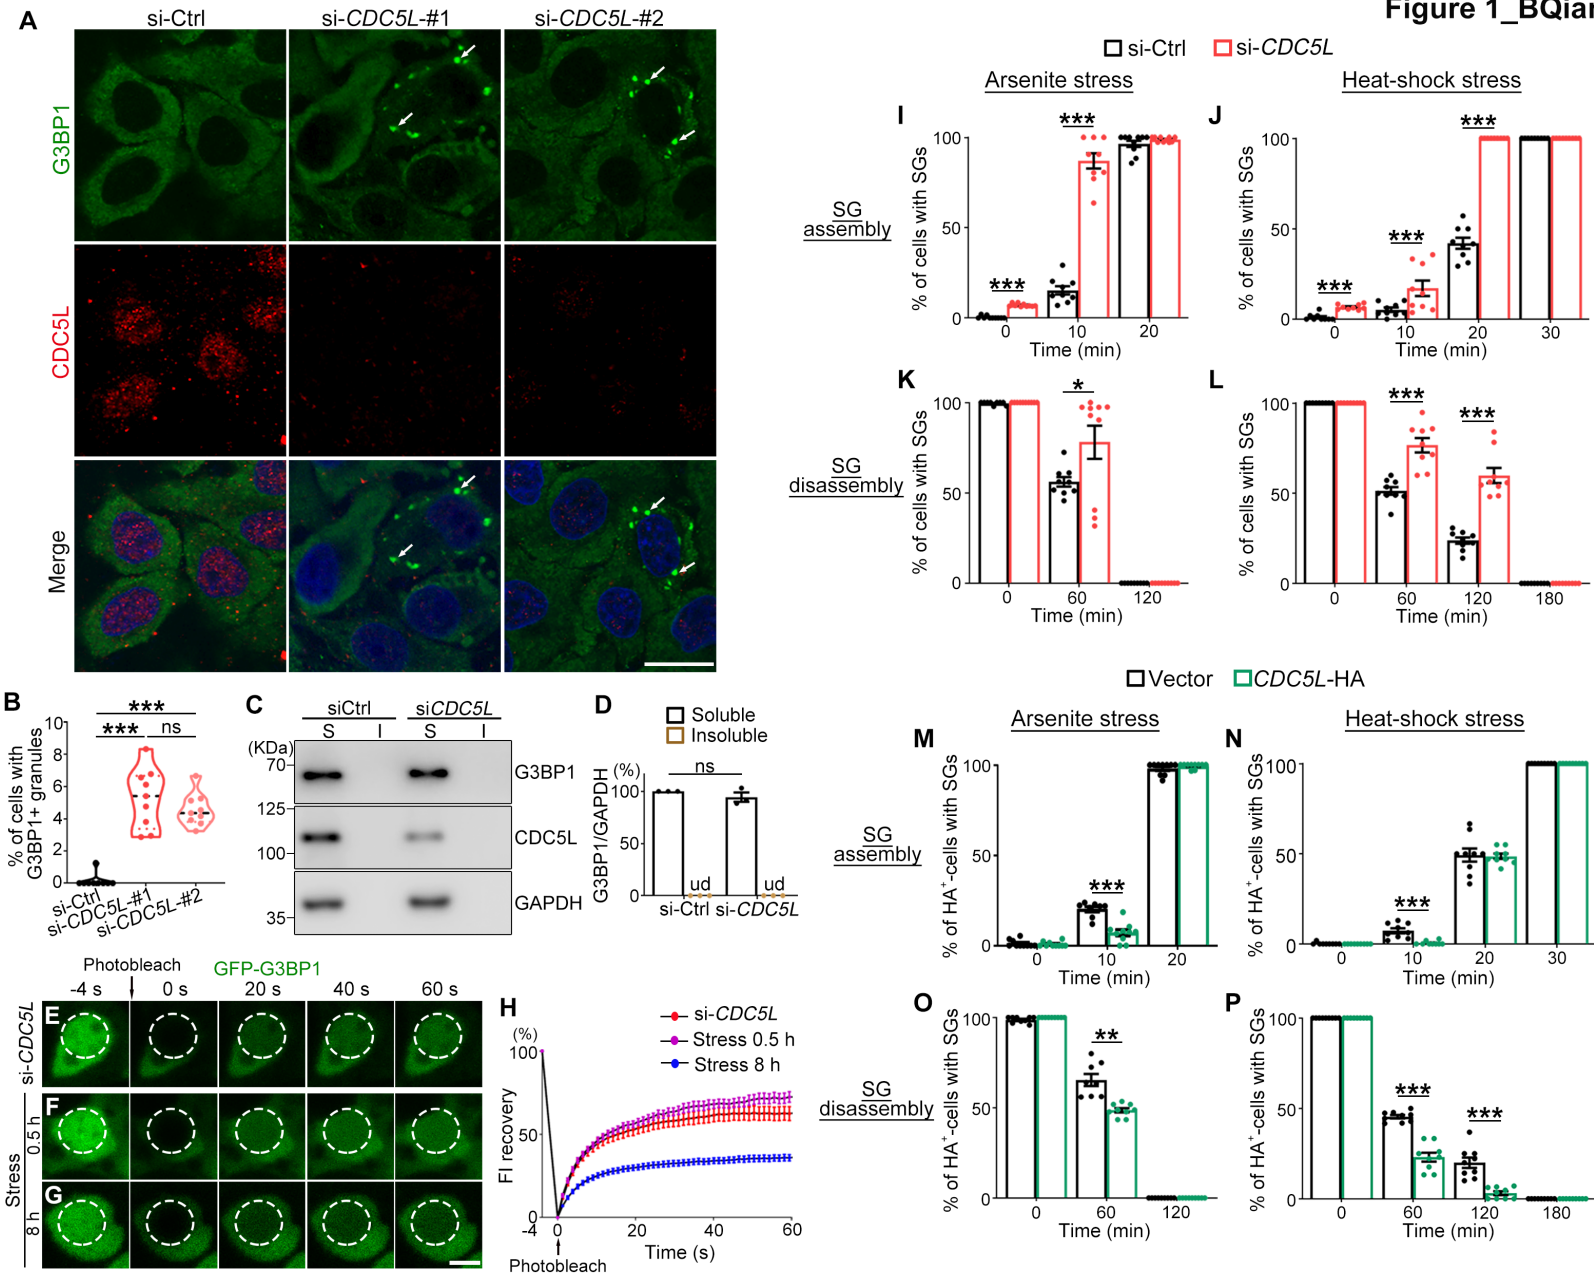

Figure 2\_BQian

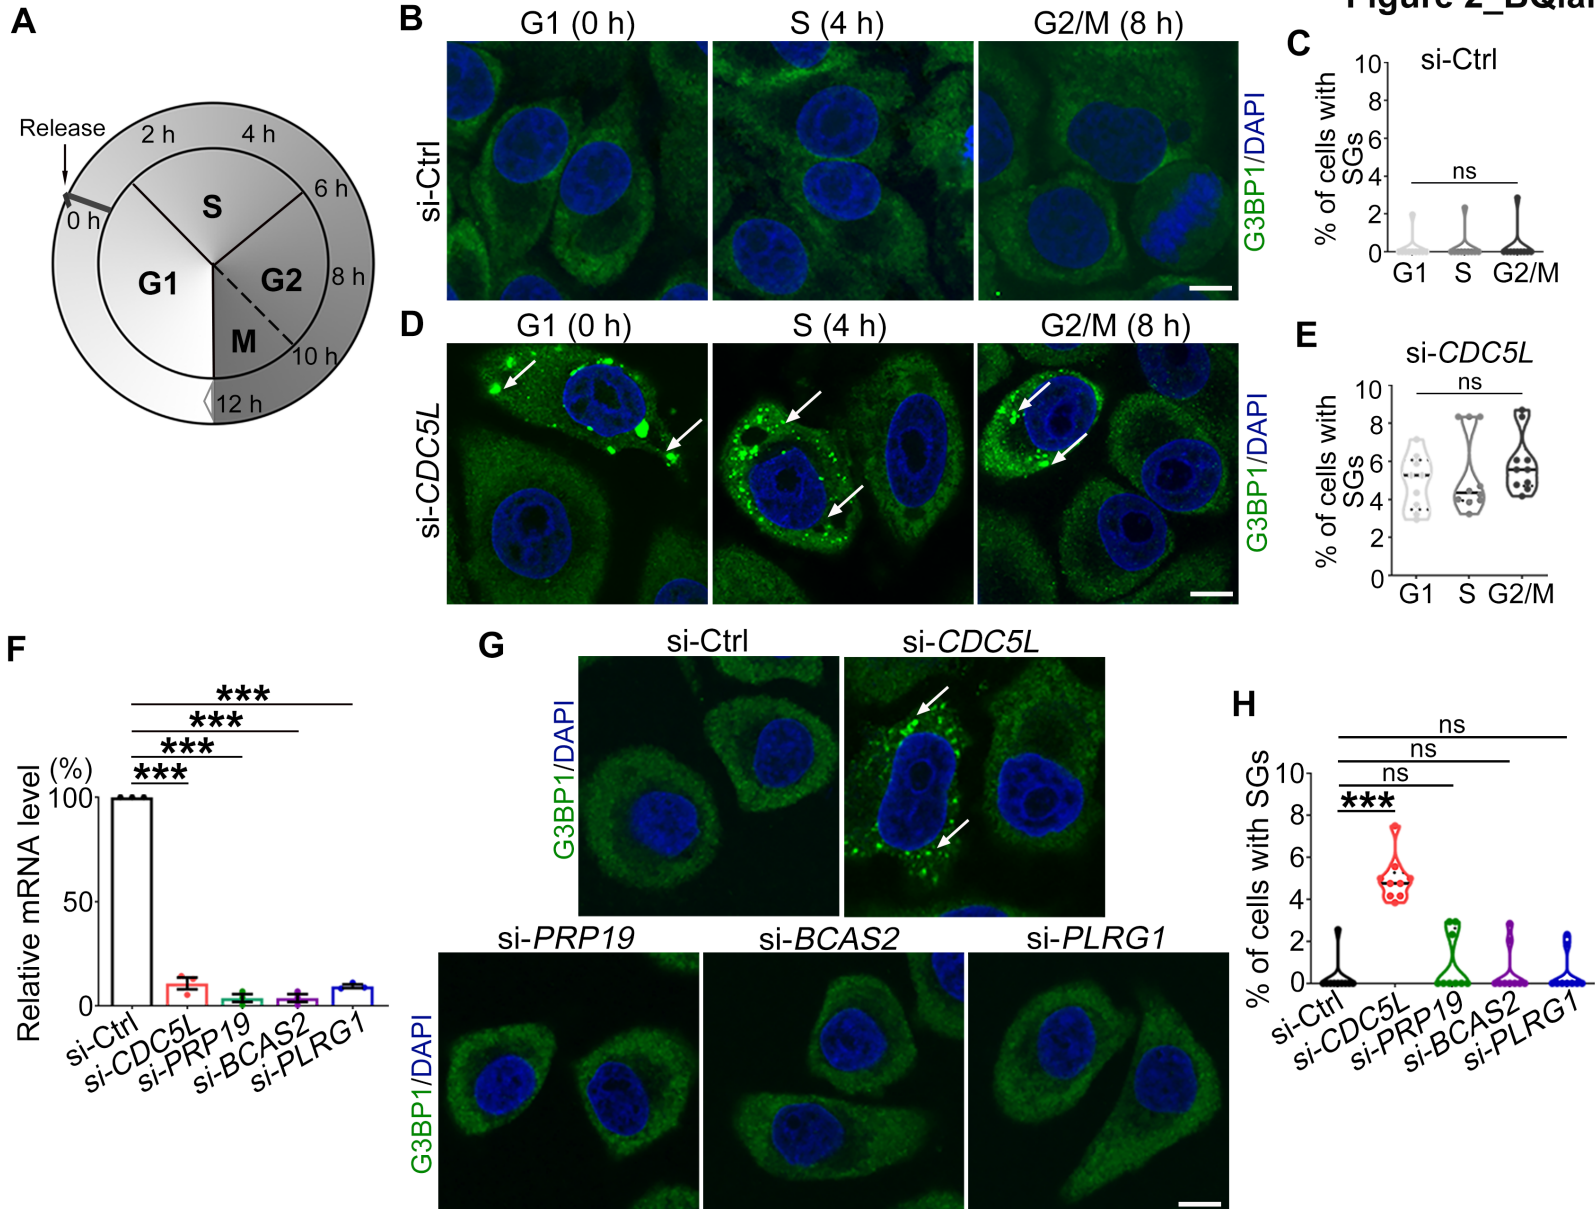

Figure 3\_BQian

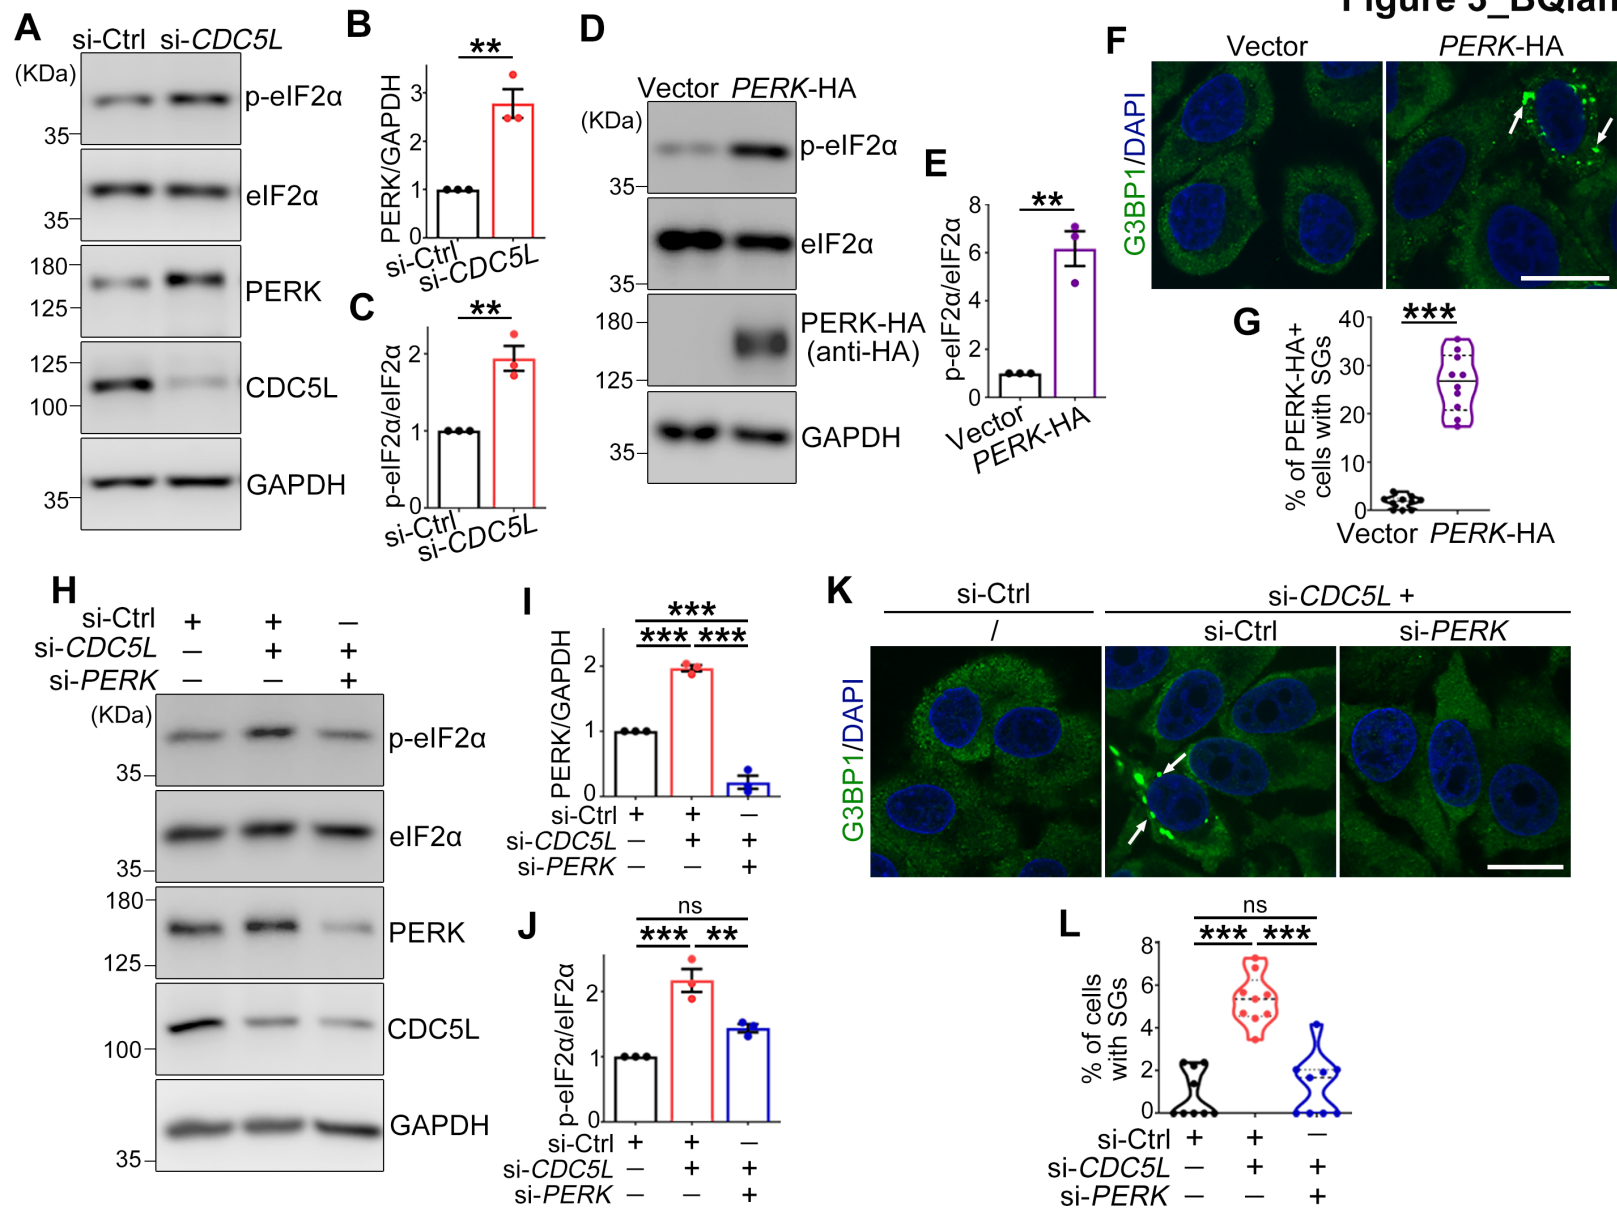

Figure 4\_BQian

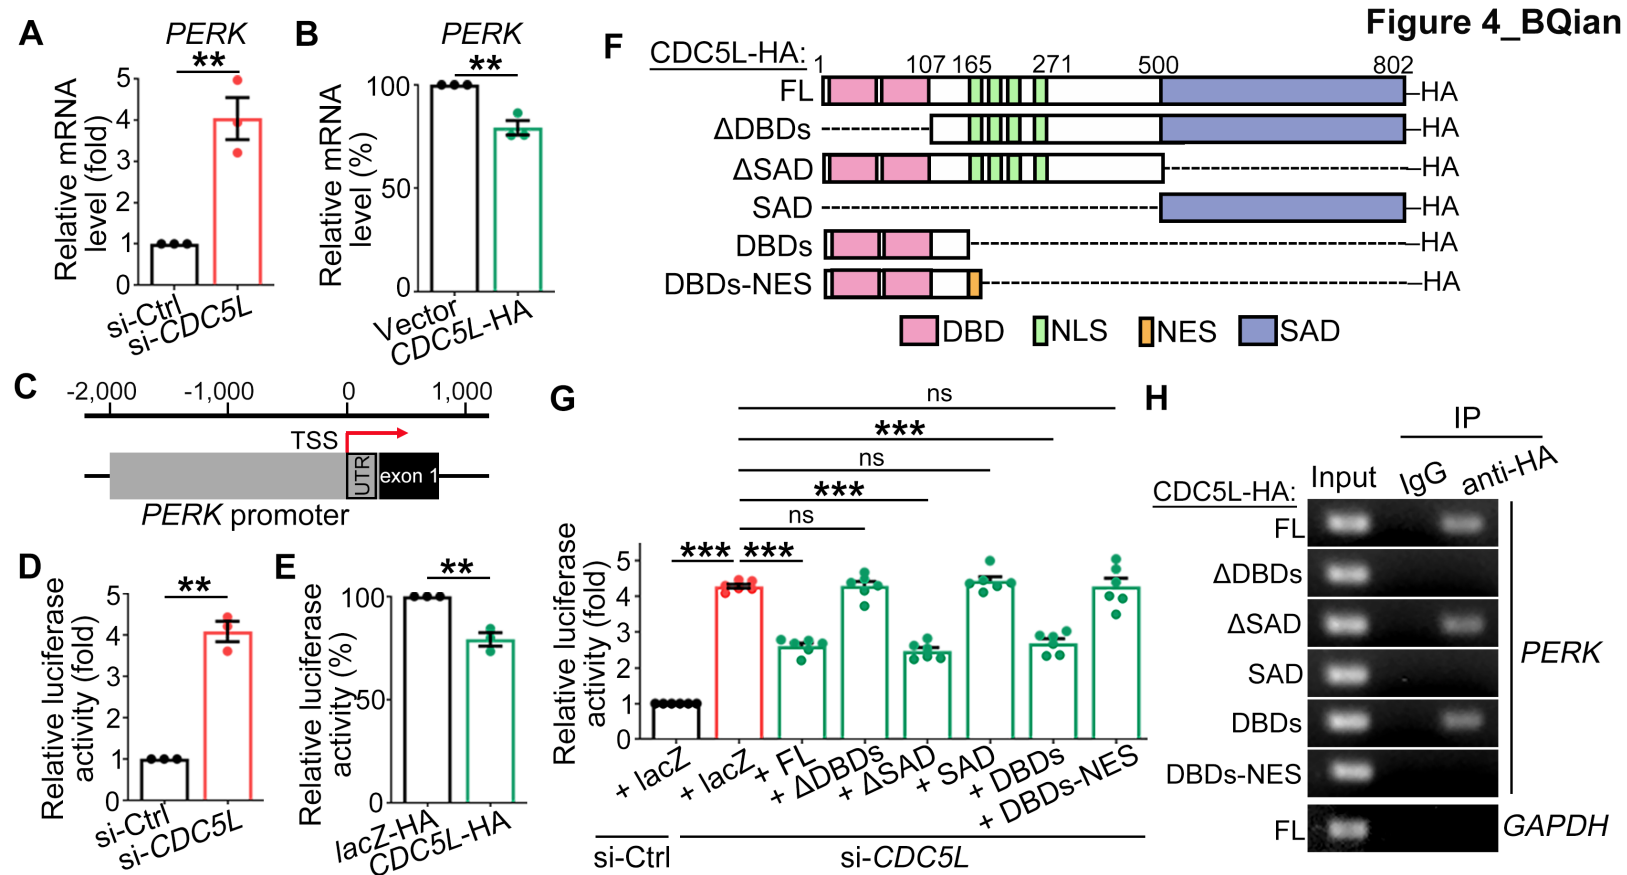



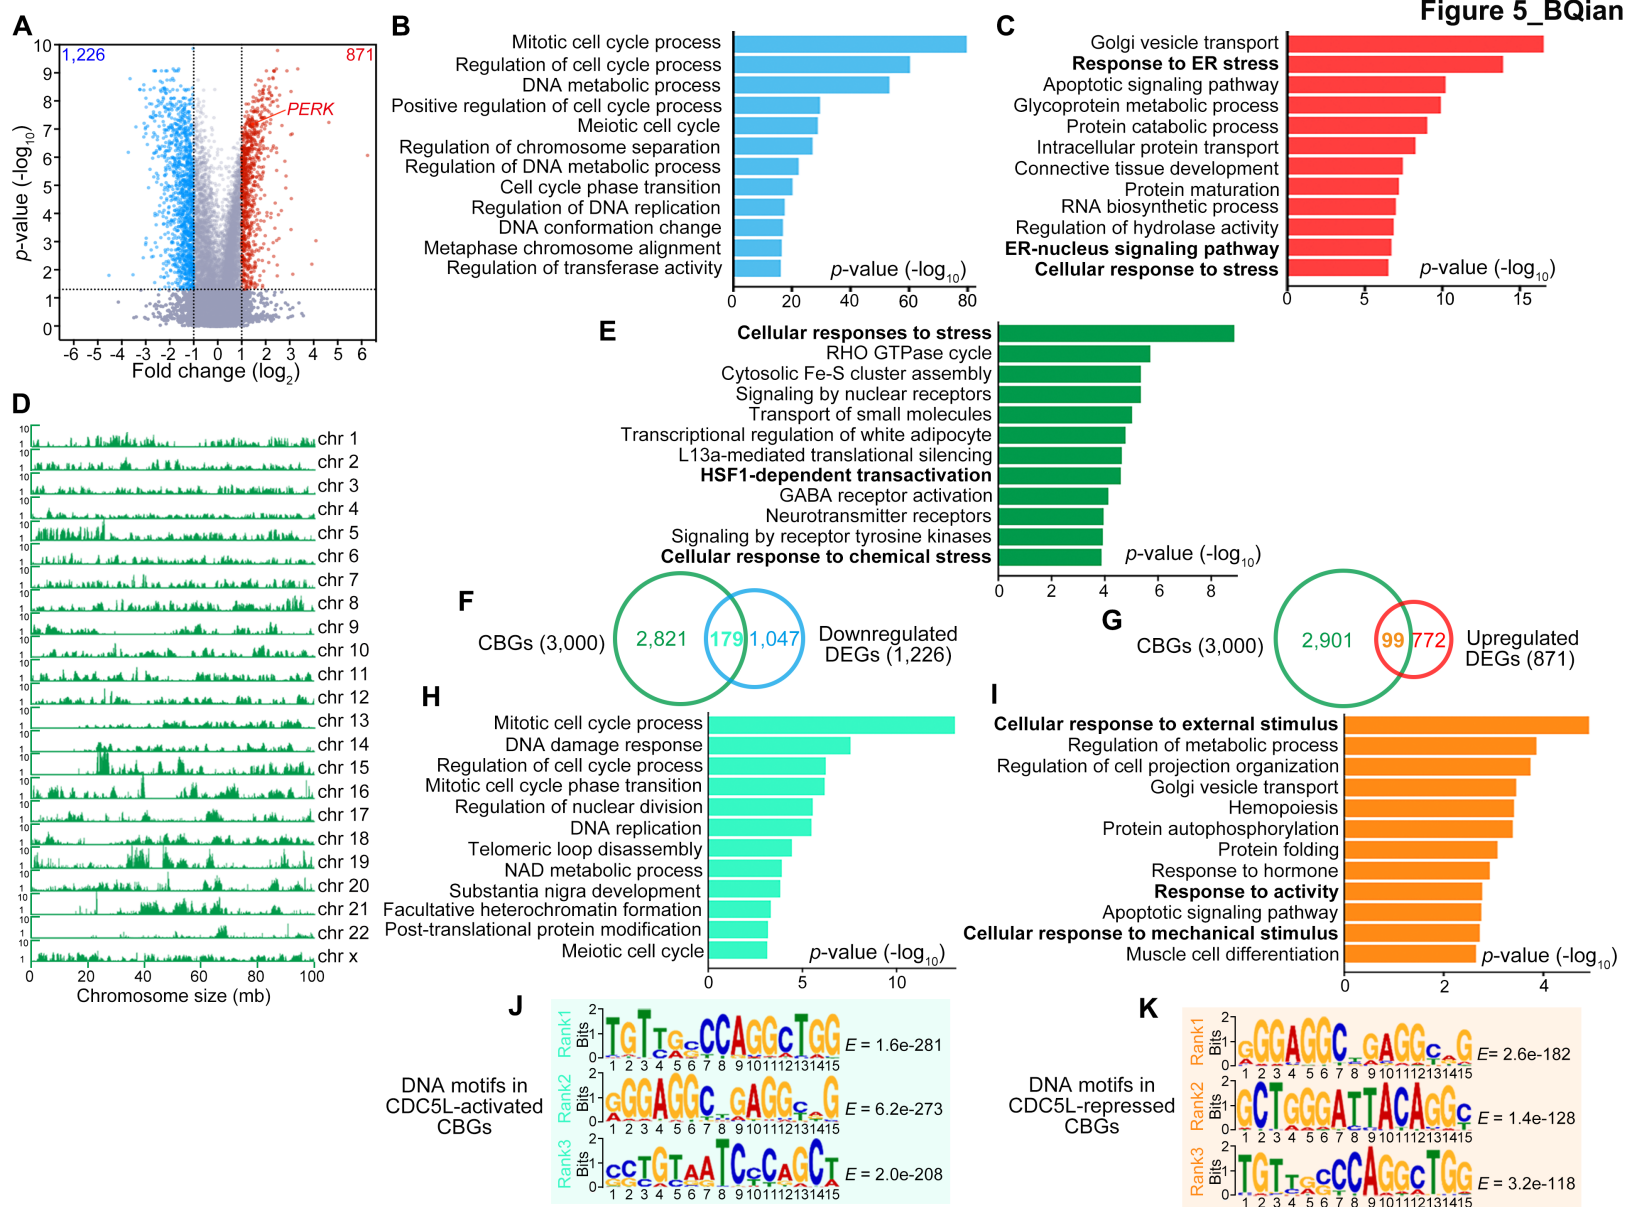

Figure 5\_BQian

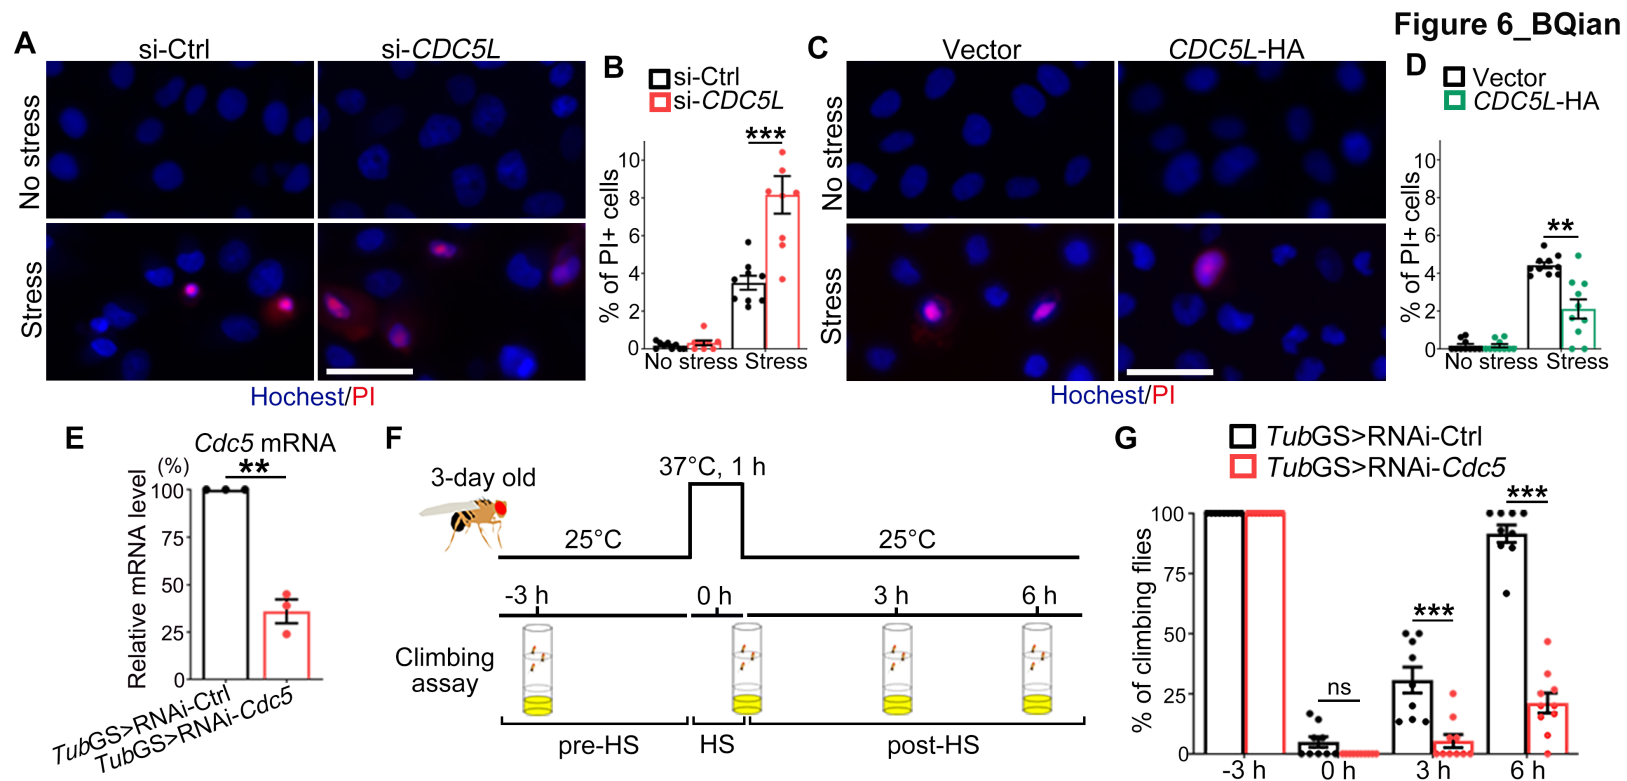

1 **SUPPORTING INFORMATION**

2

3 **CDC5L surveils cellular stress responses and stress granule formation through**  
4 **transcriptional repression**

5 Beituo Qian, Shunyi Li, Yongjia Duan, Feng Qiu, Rirong Hu, Wenkai Yue, Jihong Cui,

6 Qiangqiang Wang, Wanjin Li and Yanshan Fang<sup>#</sup>.

7 <sup>#</sup>Correspondence to: [fangys@sioc.ac.cn](mailto:fangys@sioc.ac.cn)

8

9

10 **Supplemental Inventory:**

11 Supplemental Figures S1 to S8

12 Supplemental Tables S1 to S5 (in separate spreadsheets)

13

14 SUPPLEMENTAL FIGURES

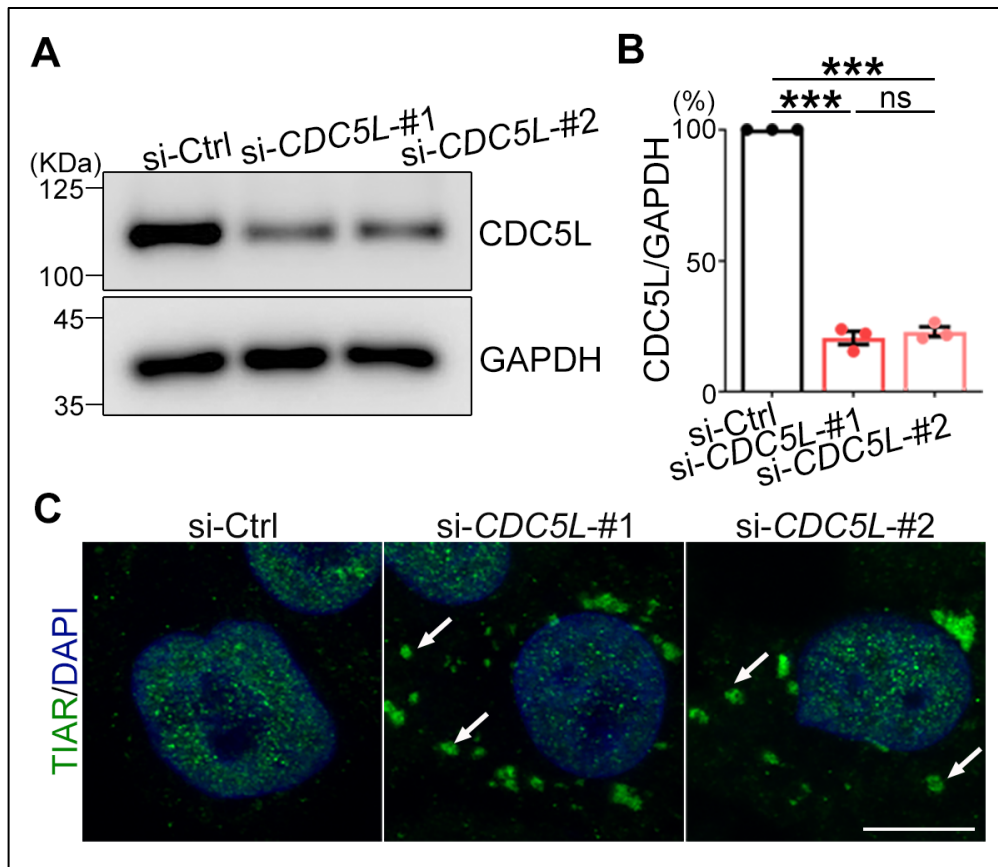

15

16 **Figure S1. KD of *CDC5L* induces spontaneous SG formation**

17 **(A)** Western blot analysis confirms the decrease in *CDC5L* protein levels in HeLa cells using the  
18 two independent siRNAs targeting *CDC5L*. **(B)** Quantification of relative *CDC5L* protein levels  
19 (normalized to GAPDH) in **(A)**. si-Ctrl, scrambled control siRNA. **(C)** Immunostaining for another  
20 SG marker, TIAR, confirms the spontaneous formation of SGs (indicated by arrows) in HeLa cells  
21 with *CDC5L* KD. DAPI, nucleus. Mean  $\pm$  SEM,  $n = 3$ . One-way ANOVA; \*\*\* $p < 0.001$ ; ns, not  
22 significant. Scale bar: 10  $\mu$ m.



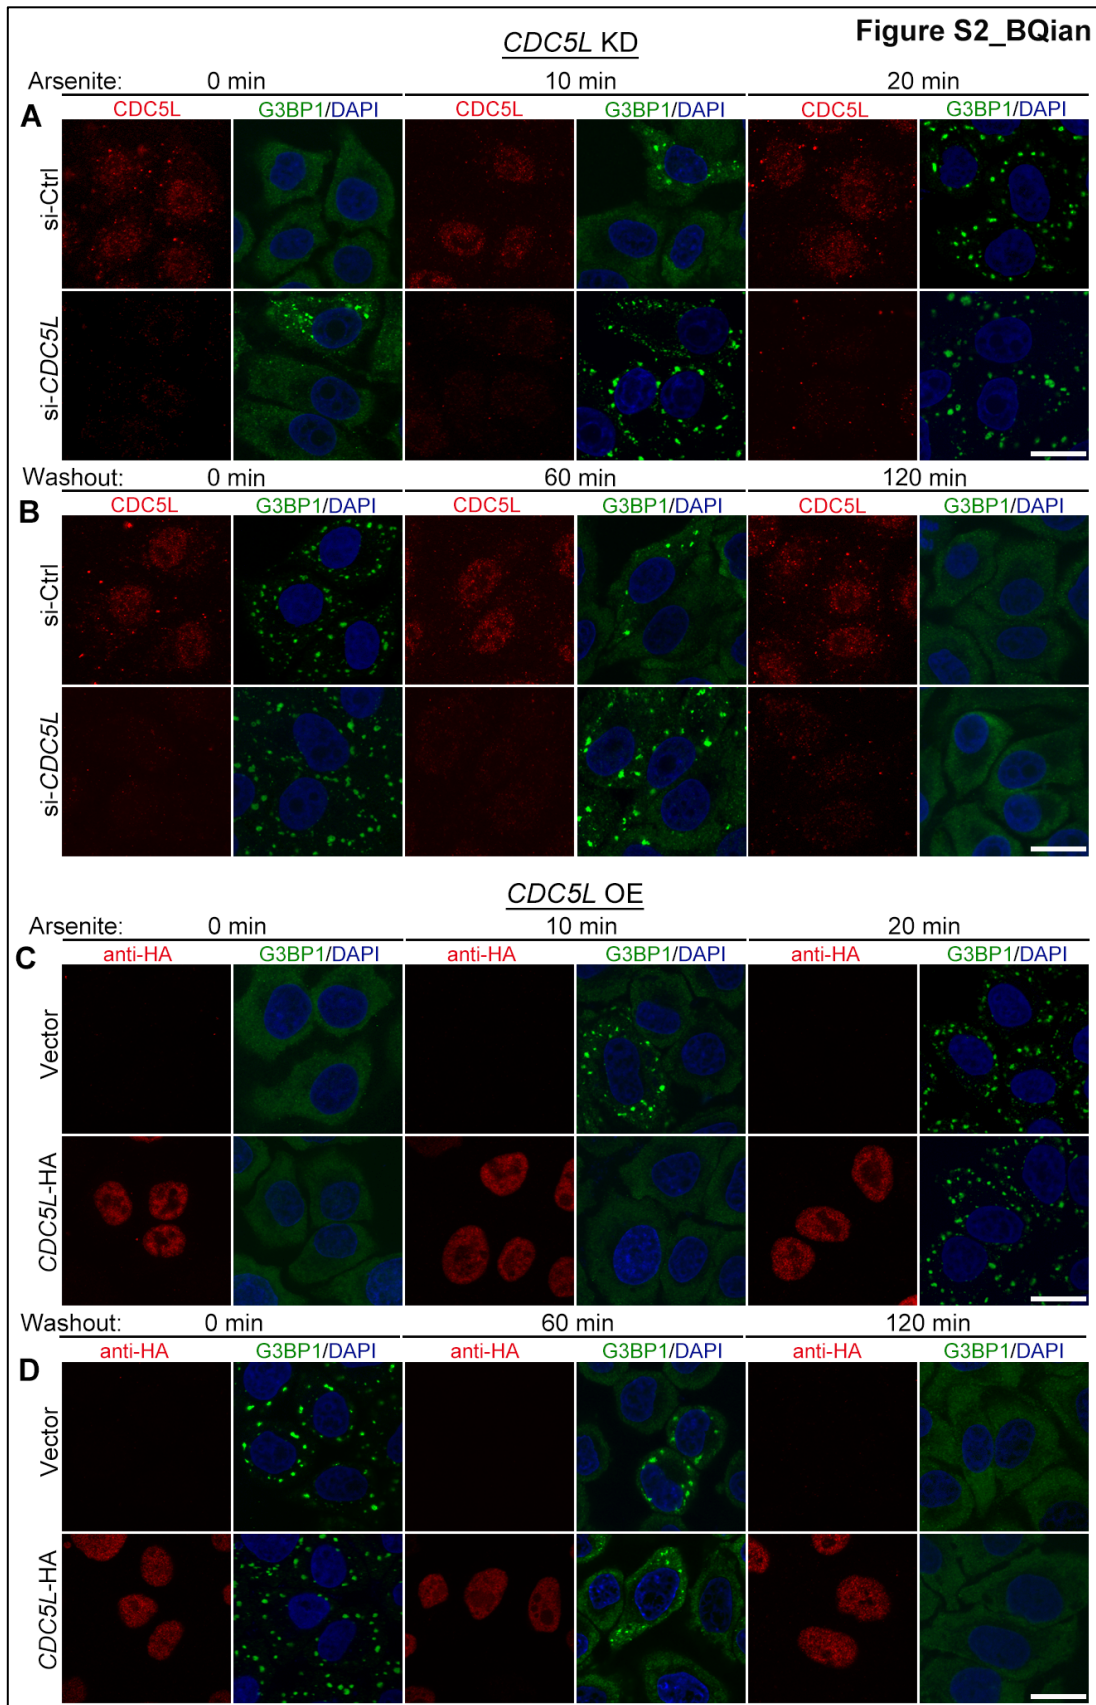

24 **Figure S2. *CDC5L* levels impact the assembly and disassembly of SGs induced by arsenite**  
25 **stress**  
26 **(A-D)** Representative confocal images at the indicated time points over the course of assembly  
27 (A, C) and disassembly (B, D) of arsenite-induced SGs in HeLa cells following siRNA KD of  
28 *CDC5L* (A-B), or transient OE of *CDC5L*-HA (C-D). Quantifications are presented in Figure 1I, K,  
29 M, and O. DAPI, nucleus. Scale bars: 20  $\mu$ m.

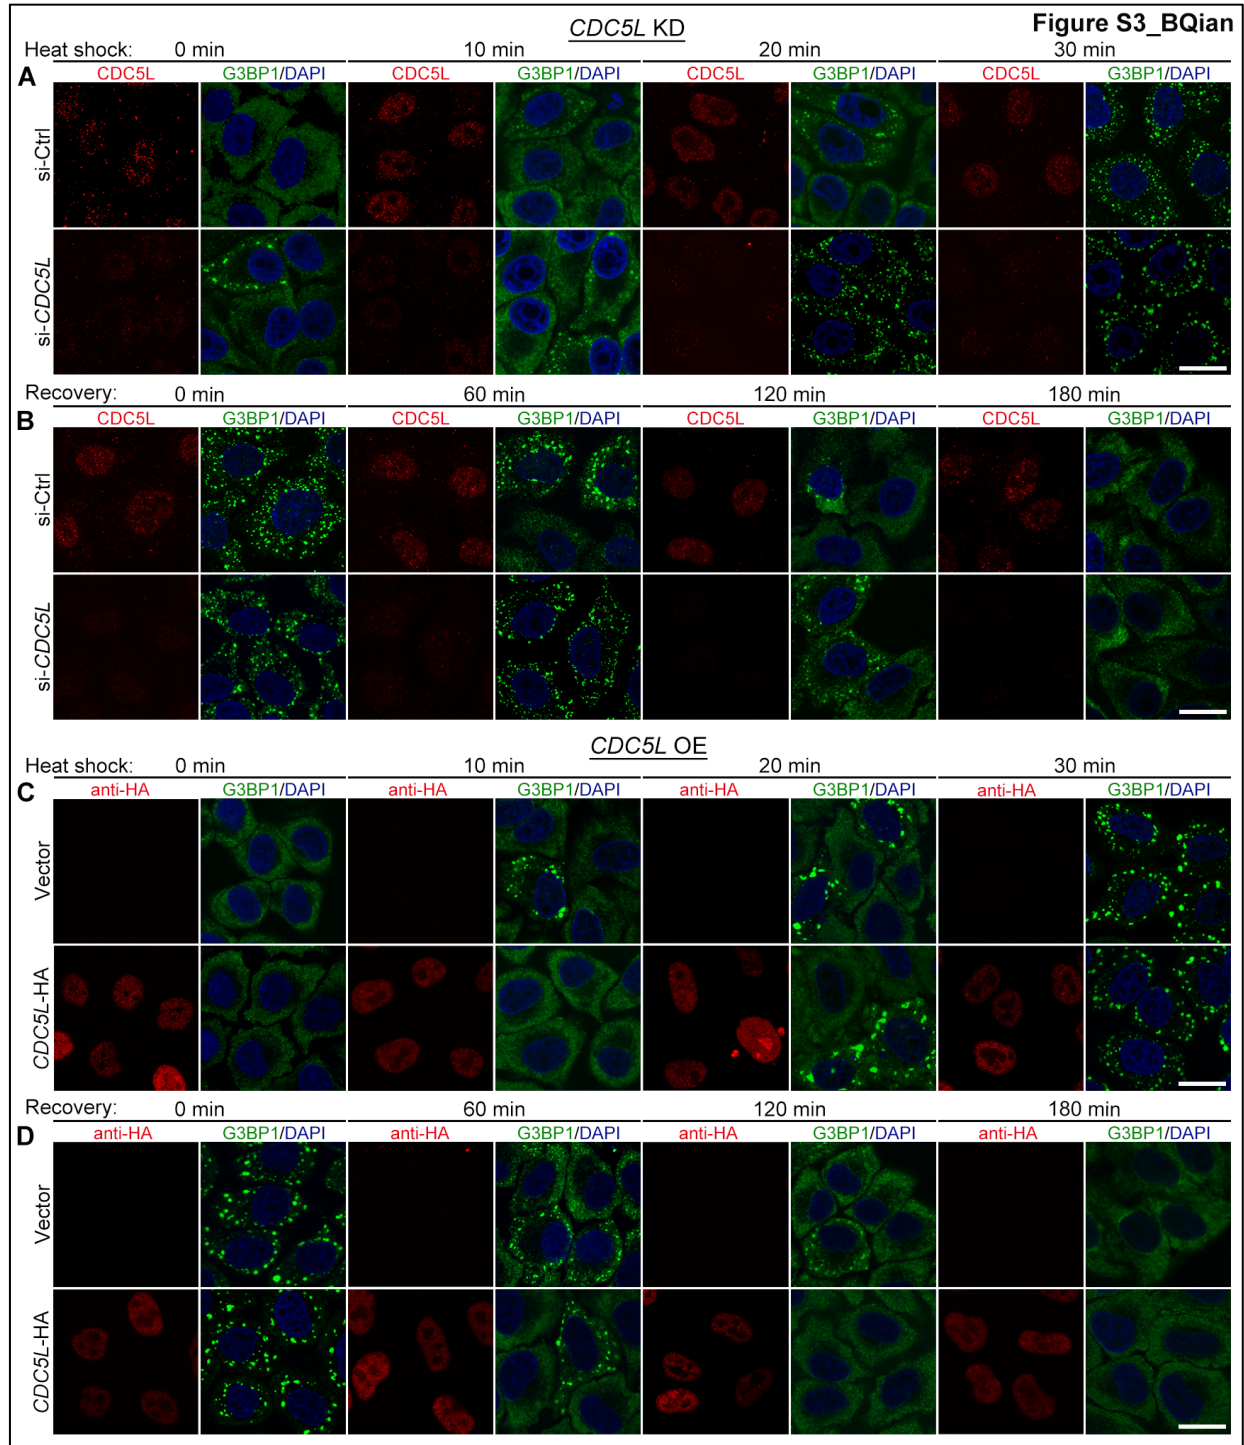

30

31 **Figure S3. CDC5L levels impact the assembly and disassembly of SGs induced by heat-**  
32 **shock stress**

33 **(A-D)** Representative confocal images at the indicated time points over the course of assembly

34 (A, C) and disassembly (B, D) of heat shock-induced SGs in HeLa cells following siRNA KD of  
35 *CDC5L* (A-B), or transient OE of *CDC5L*-HA (C-D). Quantifications are presented in Figure 1J, L,  
36 N, and P. DAPI, nucleus. Heat shock: 42°C; recovery: 37°C. Scale bars: 20 µm.

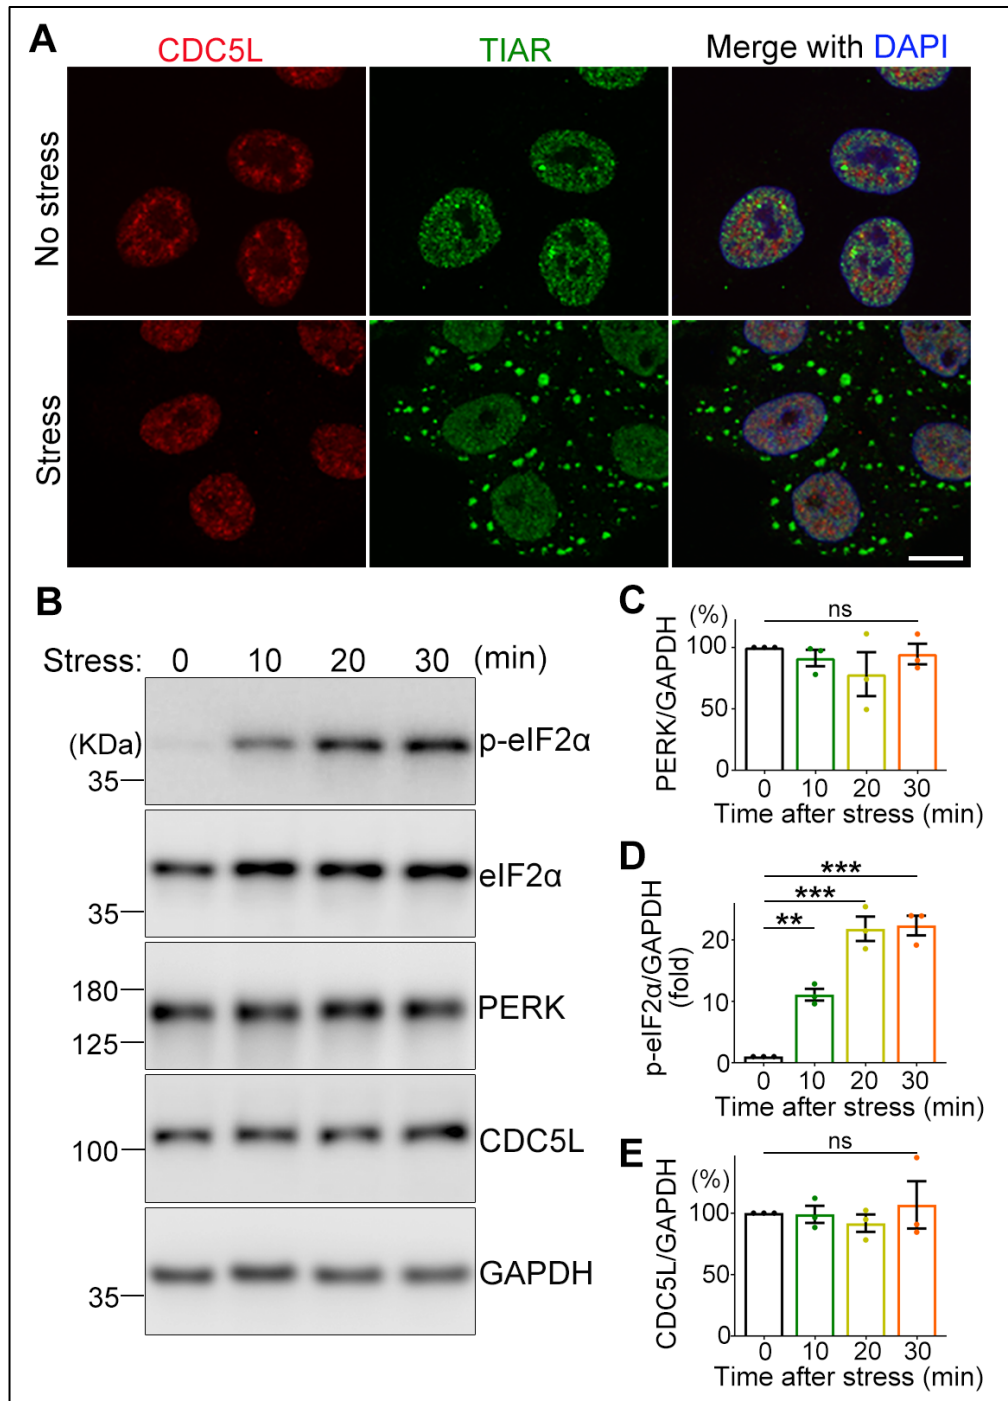

37

38 **Figure S4. CDC5L does not translocate to SGs in the cytoplasm or increase its expression**  
39 **levels in response to stress**

40 **(A)** Representative confocal images of HeLa cells untreated or treated with arsenite (250  $\mu$ M, 30  
41 min). Cells are stained for CDC5L, TIAR (SGs), and DAPI (nucleus). **(B-E)** Western blot analysis

42 (B) and quantifications (C-E) of the relative protein levels of PERK (C), phosphorylated eIF2 $\alpha$  (p-  
43 eIF2 $\alpha$ ) (D), and CDC5L (E) at the indicated time points during arsenite stress (250  $\mu$ M). Protein  
44 levels are normalized to GAPDH and shown as percentage relative to the "no stress" group (0  
45 min; set to 100%). Mean  $\pm$  SEM, n = 3. One-way ANOVA; \*\* $p$  < 0.01, \*\*\* $p$  < 0.001; ns, not  
46 significant. Scale bar: 10  $\mu$ m.



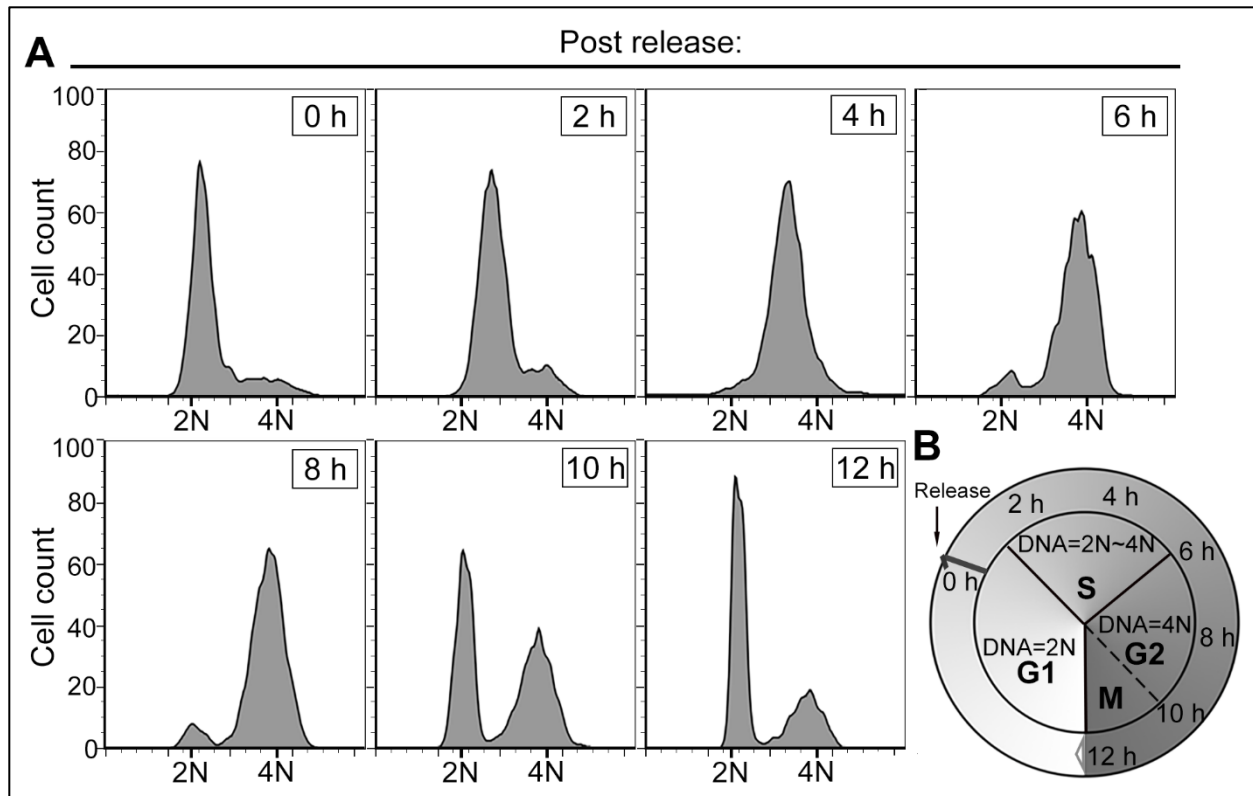

47

48 **Figure S5. Determining the different phases in the cell cycle assay**

49 (A) The different phases of the cell cycle are determined by flow cytometry analysis. Briefly, HeLa  
50 cells are synchronized and arrested at the G1 phase (DNA content = 2N) using hydroxyurea.  
51 Upon hydroxyurea removal from the culture medium, cells are released from the G1 and transition  
52 to the S phase (DNA content = 2N~4N) within 2-6 h, progress to the G2/M phase (DNA content =  
53 4N) within 6-10 h, and then enter a new cycle starting with the G1 phase (DNA content = 2N) by  
54 approximately 12 h. (B) A schematic of the cell cycle assay illustrating the different phases and  
55 their corresponding time points as determined in (A). G1 phase: the growth and metabolism phase;  
56 S phase: the DNA replication phase; G2 phase: the growth of structural elements for the mitosis  
57 phase; M phase, the mitosis phase.

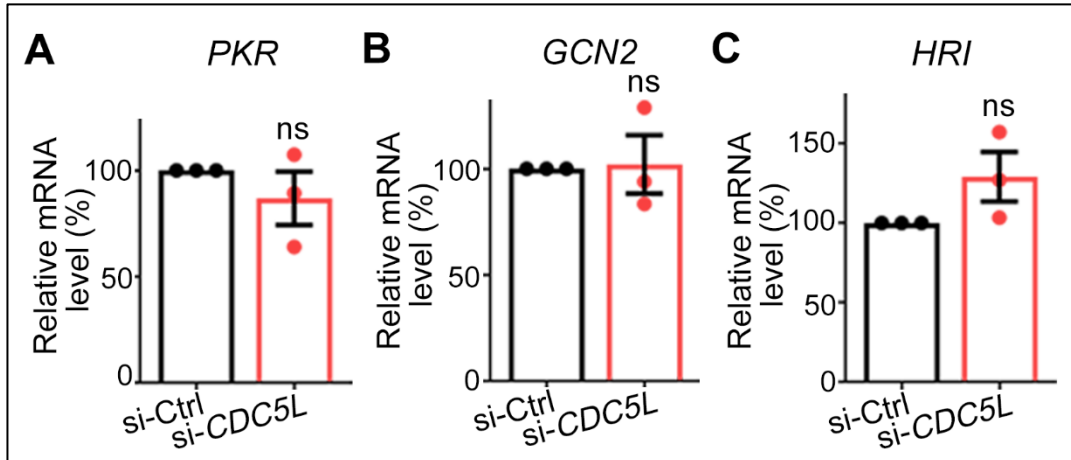

58

59 **Figure S6. KD of *CDC5L* does not affect the mRNA levels of the other three eIF2 $\alpha$  kinases**

60 **(A-C)** qPCR analysis of the mRNA levels of the other three eIF2 $\alpha$  kinases—*PKR* (A), *GCN2* (B),

61 and *HRI* (C)—in HeLa cells with *CDC5L* KD. mRNA levels are normalized to *GAPDH* and shown

62 as percentage to the si-Ctrl group (scrambled siRNA). Mean  $\pm$  SEM,  $n = 3$ . Student's *t*-test; ns,

63 not significant.



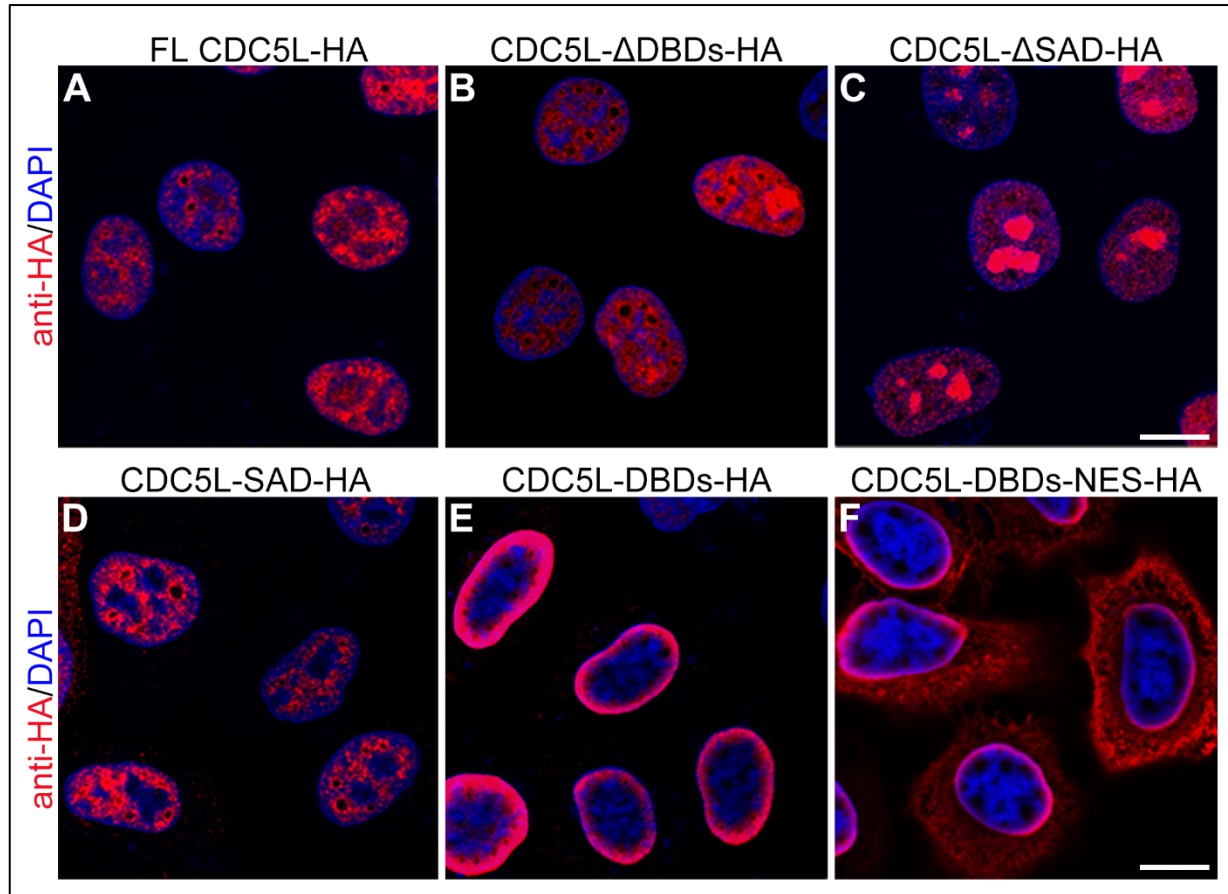

64

65 **Figure S7. Expression of full-length (FL) and truncated CDC5L proteins in HeLa cells**

66 Representative confocal images depicting the subcellular distribution of FL (A) and truncated  
67 CDC5L-HA proteins in HeLa cells, including  $\Delta$ DBDs (B),  $\Delta$ SAD (C), SAD (D), DBDs (E) and  
68 DBDs-NES (F). Cells are stained for HA and DAPI (nucleus). Scale bars: 10  $\mu$ m. Of note, although  
69 CDC5L-DBDs-HA lacks the putative NLS and shows a different sub-nuclear distribution from the  
70 other CDC5L truncation proteins, it is still localized within the nucleus, mostly along the inner side  
71 of the nuclear membrane, as demarcated by DAPI staining (E). The addition of an NES to the  
72 DBDs results in the cytoplasm localization (F), which abolishes the binding of DBDs to the *PERK*  
73 promoter as well as the repression on *PERK* transcription by DBDs, as demonstrated in Figure  
74 4G-4H.

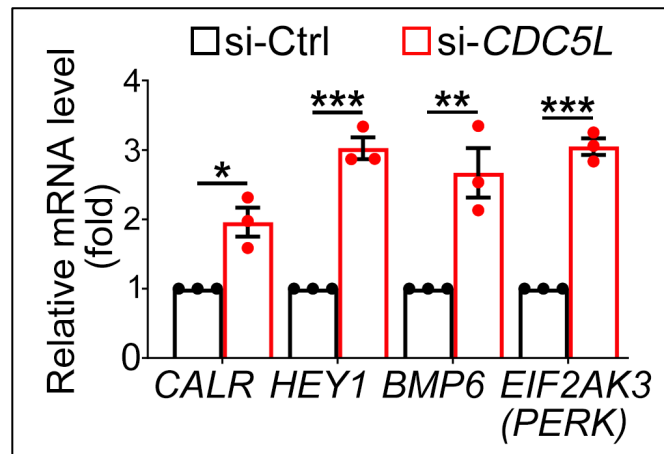

75

76 **Figure S8. Confirmation of the upregulation of other CDC5-repressed, stress response**  
77 **genes in cells following CDC5L KD**

78 The results of the qPCR analysis confirms the upregulation of other CDC5L-repressed, direct  
79 target genes involved in stress responses, such as *CALR*, *HEY1* and *BMP6*, in addition to  
80 *EIF2AK3 (PERK)* in HeLa cells following *CDC5L* KD. All mRNA levels are normalized to *GAPDH*  
81 and shown as fold change to that of the control group (set to 1). si-Ctrl: scrambled siRNA. Mean  
82  $\pm$  SEM, n = 3. Student's *t*-test; \* $p$  < 0.05, \*\* $p$  < 0.01, \*\*\* $p$  < 0.001.

83

84 **SUPPLEMENTAL TABLES**

85

86 **Table S1. The DEGs in RNA-seq analysis of HeLa cells with *CDC5L* KD**

87 **Table S2. The CBGs from CHIP-seq analysis of HeLa cell expressing *CDC5L*-HA**

88 **Table S3. The downregulated CBGs and their GO term analysis**

89 **Table S4. The upregulated CBGs and their GO term analysis**

90 **Table S5. Primer information for PCR and qPCR in this study**
